# Supplementary material for: Does internet-based cognitive behaviour therapy reduce healthcare costs and resource use in treatment of social anxiety disorder? A cost-minimisation analysis conducted alongside a randomised controlled trial
Source: PubMed Central journal article supplement — BMJ Open. 2017 Sep 11;7(9):e017053. doi: 10.1136/bmjopen-2017-017053 (PMC5595196; doi:10.1136/bmjopen-2017-017053), 2017-09-11
Supplement: bmjopen-2017-017053.draft_revisions.pdf [file bmjopen-2017-017053.draft_revisions.pdf]

# BMJ Open

BMJ Open is committed to open peer review. As part of this commitment we make the peer review history of every article we publish publicly available.

When an article is published we post the peer reviewers' comments and the authors' responses online. We also post the versions of the paper that were used during peer review. These are the versions that the peer review comments apply to.

The versions of the paper that follow are the versions that were submitted during the peer review process. They are not the versions of record or the final published versions. They should not be cited or distributed as the published version of this manuscript.

BMJ Open is an open access journal and the full, final, typeset and author-corrected version of record of the manuscript is available on our site with no access controls, subscription charges or pay-per-view fees (<http://bmjopen.bmj.com>).

If you have any questions on BMJ Open's open peer review process please email [editorial.bmjopen@bmj.com](mailto:editorial.bmjopen@bmj.com)

# BMJ Open

## Does internet-based cognitive behaviour therapy reduce healthcare costs and resource use in treatment of social anxiety disorder? A cost minimisation analysis conducted alongside a randomized controlled trial

|                                 |                                                                                                                                                                                                                                        |
|---------------------------------|----------------------------------------------------------------------------------------------------------------------------------------------------------------------------------------------------------------------------------------|
| Journal:                        | <i>BMJ Open</i>                                                                                                                                                                                                                        |
| Manuscript ID                   | bmjopen-2017-017053                                                                                                                                                                                                                    |
| Article Type:                   | Research                                                                                                                                                                                                                               |
| Date Submitted by the Author:   | 28-Mar-2017                                                                                                                                                                                                                            |
| Complete List of Authors:       | El Alaoui, Samir; Karolinska Institutet, Department of Clinical Neuroscience<br>Hedman, Erik; Karolinska Institutet, Department of Clinical Neuroscience<br>Lindfors, Nils; Karolinska Institutet, Department of Clinical Neuroscience |
| <b>Primary Subject Heading</b>: | Mental health                                                                                                                                                                                                                          |
| Secondary Subject Heading:      | Health economics                                                                                                                                                                                                                       |
| Keywords:                       | MENTAL HEALTH, PSYCHIATRY, Anxiety disorders < PSYCHIATRY                                                                                                                                                                              |
|                                 |                                                                                                                                                                                                                                        |

SCHOLARONE™  
Manuscripts

1  
2  
3 **Does internet-based cognitive behaviour therapy reduce healthcare costs and resource**  
4 **use in treatment of social anxiety disorder? A cost minimisation analysis conducted**  
5 **alongside a randomized controlled trial**  
6  
7  
8  
9

10  
11  
12  
13  
14 Samir El Alaoui, PhD; Erik Hedman, PhD and Nils Lindefors, MD, PhD  
15  
16

17  
18 **Author Affiliations:** Department of Clinical Neuroscience, Division of Psychiatry,  
19  
20 Karolinska Institutet, Stockholm, Sweden (Dr El Alaoui, Dr Lindefors); Department of  
21  
22 Clinical Neuroscience, Osher Center for Integrative Medicine, Karolinska Institutet,  
23  
24 Stockholm, Sweden (Dr Hedman); Department of Clinical Neuroscience, Division of  
25  
26 Psychology, Karolinska Institutet, Stockholm, Sweden (Dr Hedman)  
27  
28  
29

30  
31  
32 **Corresponding Author:** Samir El Alaoui, PhD, Department of Clinical Neuroscience (CNS),  
33  
34 M58, Karolinska Universitetssjukhuset, Huddinge 141 86 Stockholm, Sweden  
35  
36

37  
38 Email: [samir.el.alaoui@ki.se](mailto:samir.el.alaoui@ki.se)  
39  
40

41  
42  
43 Word count: 2209 (main text); 219 (abstract)  
44

45 Tables: 1  
46

47 Figures: 1  
48  
49  
50  
51  
52  
53  
54  
55  
56  
57  
58  
59  
60

## Abstract

**Objectives:** Social anxiety disorder (SAD) can be effectively treated with internet-delivered cognitive behavioural therapy (ICBT), but studies on long-term cost-minimization from a healthcare provider perspective in comparison to an evidence-based control treatment of therapeutic equivalence are lacking. The objective of the study was to determine whether ICBT reduces healthcare costs and use of healthcare resources compared to cognitive behavioural group therapy (CBGT).

**Design:** A cost-minimization study alongside an RCT where participants (N=126) with a diagnosis SAD were randomised to ICBT or to CBGT. Costs measured from a healthcare provider perspective were estimated using time-driven activity based costing alongside with health status over four years from baseline measured with EQ-5D.

**Setting:** A psychiatric outpatient clinic in Stockholm, Sweden.

**Participants:** Participants were 126 individuals with social anxiety disorder.

**Primary and secondary outcome measures:** Changes in EQ-5D and costs.

**Interventions:** Participants received either cognitive behavioral group therapy (CBGT) or Internet-based cognitive behavior therapy (ICBT) ICBT for a duration of 15 weeks.

**Results:** ICBT minimized total treatment costs. Mean improvement in health status ( $d = -0.36$  to  $-0.25$ ) was equivalent in both treatments over the study period, while healthcare costs were

1  
2  
3 lower in ICBT (463 €, 95% CI: 446 € to 480 €) compared with the control group (806 € (95%  
4  
5 CI: 730 € to 883 €). Mean use of effective psychologist time in ICBT was 189.60 (SD =  
6  
7 53.77) minutes compared to 499.78 (SD = 30.91) in the CBGT group.  
8  
9

10  
11 **Conclusions:** In treatment of SAD, ICBT is equally effective but is associated with more  
12  
13 efficient staff utilization and considerably less costs compared with CBGT. From a health  
14  
15 care provider perspective, ICBT is an advantageous treatment option.  
16  
17  
18  
19

### 20 21 **Strengths and limitations of this study**

- 22 • Randomized controlled design.
- 23 • Low attrition rates.
- 24 • Includes long-term follow-up data.
- 25 • It may be difficult to generalize time and cost estimates of resource use to other  
26  
27  
28  
29  
30  
31  
32 settings.  
33  
34  
35  
36

### 37 38 **<Introduction>**

39  
40  
41 Common mental health problems including depression and anxiety disorders are a major  
42  
43 concern globally, and in the UK affecting approximately 17% of the population (1). The cost  
44  
45 of these problems in England alone has been estimated at £105.2 billion (approximately 121  
46  
47 billion Euros) which includes costs associated with reduced health-related quality of life, lost  
48  
49 productivity and social and health care costs (2). Social anxiety disorder (SAD) is one of the  
50  
51 most prevalent anxiety disorders with a 12-month prevalence of 2.8%-7.1% and a lifetime  
52  
53 prevalence of 5%-12.1% (3-5). SAD is associated with functional impairment and typically  
54  
55 follows a chronic course if untreated (6-9). The National Institute for Health and Care  
56  
57  
58  
59  
60

1  
2  
3 Excellence (NICE) in the UK recommends cognitive behavioural therapy (CBT) as the first-  
4 line treatment option for SAD (10). Cognitive behavioural group therapy (CBGT) is an  
5 effective format of CBT provision in the treatment of SAD (11, 12). Although patients prefer  
6 psychological therapies to medication, access is limited in both primary and secondary care.  
7  
8  
9  
10  
11  
12 (13)

13  
14 Recently, Internet-based cognitive behaviour therapy (ICBT) has emerged as an  
15 empirically supported treatment for SAD with effect sizes on par with those of CBGT and  
16 tested in at least 16 randomized controlled trials (14). Even though some previous studies  
17 indicate that ICBT for SAD can be cost-effective (15, 16), evidence is lacking concerning  
18 health economic evaluations from a health care provider perspective. In the present study we  
19 used the time-driven activity based costing method, which is a method that takes into account  
20 all costs related to the treatment from the health care provider's perspective. To our  
21 knowledge, this has not been previously done concerning ICBT for SAD.  
22  
23  
24  
25  
26  
27  
28  
29  
30  
31

32 The difference between cost-effectiveness analysis (CEA) and cost-  
33 minimization analysis (CMA) has been discussed elsewhere (17); a full cost-effectiveness  
34 analysis is often a preferred method to assess differences in both costs and effects. However,  
35 in the context of a non-inferiority trial where treatments have been found to be equally  
36 effective, CMA may be an appropriate method to analyze cost differences (18), since the  
37 focus of interest is which treatment is less expensive.  
38  
39  
40  
41  
42  
43  
44

45 The original RCT demonstrated that both treatment delivery methods yielded  
46 similar health improvements. In the present study, given the equivalence in treatment  
47 effectiveness, the aim was to assess whether ICBT would help minimize the costs of  
48 healthcare use relative to CBGT by using both data from a randomized controlled trial (19)  
49 and additionally collected data on resource use. In contrast to previous health economic  
50 evaluations (15, 20), the present study adopted a health care provider perspective using time-  
51  
52  
53  
54  
55  
56  
57  
58  
59  
60

1  
2  
3 driven activity based costing methodology. If ICBT is found to help minimize the costs of  
4  
5 healthcare use relative to CBGT, such internet-based interventions have the potential to  
6  
7 increase access to psychological therapy in psychiatry and primary care and could represent  
8  
9 an efficient alternative psychological treatment for SAD.  
10

## 11 12 13 <Method>

### 14 15 <Design>

16  
17 This was a cost-minimization analysis adopting a healthcare provider perspective, conducted  
18  
19 alongside a non-inferiority trial within the context of a parallel group study with unrestricted  
20  
21 randomization in 1:1 ratio (ICBT or CBGT). Costs measured from a healthcare provider  
22  
23 perspective were estimated using time-driven activity based costing alongside with health  
24  
25 status over four years from baseline measured with EQ-5D. All costs were estimated based on  
26  
27 thorough assessment of the costs associated with ICBT when delivered in regular care (which  
28  
29 was implemented at the clinic after the RCT); this was done in order not to underestimate the  
30  
31 treatment costs. The trial was registered at [clinicaltrials.gov](http://clinicaltrials.gov) (identifier NCT00564967). The  
32  
33 main outcome study has been reported elsewhere (19).  
34  
35  
36  
37  
38  
39

### 40 41 <Recruitment, inclusion criteria and participants>

42  
43 The study was conducted at a public ICBT unit in Stockholm, Sweden (Stockholm Health  
44  
45 Care Services). Participants were recruited by self-referral (n = 97) or by referral from  
46  
47 primary care physicians and psychiatrists (n = 29). The study protocol was approved by the  
48  
49 Regional Ethical Review Board in Stockholm and informed consent was obtained from all  
50  
51 participants. The recruitment took place between 2007 and 2009. The participant flow  
52  
53 throughout the trial is presented in the main outcome study (19).  
54  
55  
56  
57  
58  
59  
60

1  
2  
3 <Treatments>  
4

5 ≤ Internet-based cognitive behaviour therapy (ICBT)>  
6

7 The internet-delivered treatment was based on and adapted from a treatment originally  
8 developed by Andersson and colleagues and followed a CBT model developed for individual  
9 therapy of SAD (21-23). The treatment content was accessed as text modules similar to  
10 chapters in self-help bibliotherapy. Each chapter corresponded to a CBT session with a  
11 specific theme such as cognitive restructuring, graded exposure or behavioral experiments,  
12 coupled with homework assignments. Patients received supportive email feedback from a  
13 psychologist after each module. The duration of the internet-based intervention was 15 weeks,  
14 and therapists were instructed to restrict time spent on each patient to approximately 10  
15 minutes per week.  
16  
17  
18  
19  
20  
21  
22  
23  
24  
25  
26  
27

28  
29 ≤ Cognitive behavioural group therapy (CBGT)>  
30

31 The group CBT for SAD followed the protocol developed by Heimberg and Becker (2002).  
32 The treatment was equally long as the ICBT (i.e. 15 weeks) consisting of one initial  
33 individual session followed by 14 group sessions. Each session was 2.5 hours long and led by  
34 therapists trained in CBT. Each group consisted of six to seven patients.  
35  
36  
37  
38  
39  
40  
41  
42

43 <Outcome measure>  
44

45 EuroQol (EQ-5D) index values were used to assess improvements in health-related quality of  
46 life (EuroQol-Group, 1990). The EQ-5D is non-disease specific and measures five health  
47 domains of importance to quality of life: mobility, self-care, usual activities, pain/discomfort  
48 and anxiety/depression.  
49  
50  
51  
52

53  
54  
55 <Resource use>  
56  
57  
58  
59  
60



1  
2  
3 Resource use was estimated by using a bottom-up approach where the clinical and  
4  
5 administrative activities performed throughout the treatment delivery cycle were first  
6  
7 documented through process maps. This allowed us to identify resource use in terms of type  
8  
9 (e.g. personnel, hospital space, IT) and time (measured in minutes and collected through time  
10  
11 studies and interviews). The time studies and estimations on resource use were conducted at  
12  
13 the treatment facility after the original RCT had been completed, i.e. when the treatment had  
14  
15 been implemented as routine care.  
16  
17

#### 18 19 20 <Costs> 21

22 Time-driven activity-based costing (TDABC) was used to determine the costs associated with  
23  
24 ICBT and CBGT from a healthcare provider perspective (24). Based on estimated resource  
25  
26 use (described above), the capacity cost rate (i.e. cost per minute) was calculated for each  
27  
28 resource. For example, the minute-cost for a psychologist was calculated by dividing the total  
29  
30 annual salary by the total number of minutes worked. Since not all time worked was available  
31  
32 for clinical care due to meetings, training and breaks etc., the practical capacity of each staff  
33  
34 category was estimated to be 80% of the actual number of worked hours, which is typically  
35  
36 used as a standard assumption (24). Finally, the total cost of each treatment episode was  
37  
38 calculated for each patient by multiplying the minute cost for each resource with the total  
39  
40 number of minutes spent on each activity and then summing across all resources. Time  
41  
42 estimates (and thus costs) not related to psychologists (e.g. assessments by medical doctors  
43  
44 and administrative tasks by nurses and secretaries outside of treatment) were assumed to be  
45  
46 similar in both groups. Costs and were discounted at an annual rate of 5% and are presented in  
47  
48 € , year 2017 values.  
49  
50  
51  
52

#### 53 54 55 <Cost-minimization analysis> 56 57 58 59 60

1  
2  
3 Since previous studies have demonstrated equivalence in treatment effectiveness, a CMA was  
4 conducted where costs per course of treatment from a healthcare provider perspective were  
5 calculated and compared between treatment groups in a cost-minimization analysis; if total  
6 costs were reduced by more efficient resource use, cost-minimization may be achieved (18).  
7  
8 In order to avoid biased estimation of uncertainty, we have used the statistical methods of  
9 cost-effectiveness to evaluate the joint distributions of costs and benefits.  
10  
11  
12  
13  
14  
15  
16  
17  
18

## 19 <Results>

### 20 <Outcomes>

21  
22 As previously reported (20) the between-group effect size on EQ5D was -0.18 (95% CI: -0.53  
23 to 0.17), indicating equivalence in treatment effects. The within-group effect size was -0.36  
24 (95% CI: -0.70 to -0.01) for ICBT and -0.25 (95% CI: -0.60 to 0.10) for CBGT.  
25  
26  
27  
28  
29  
30  
31

### 32 <Resource use>

33  
34 An independent-samples t-test was conducted to compare psychologist time in ICBT and  
35 CBGT treatments. There was a significantly lower use of psychologist time in ICBT (M =  
36 189.60, SD = 53.77) compared to CBGT (M = 499.78, SD = 30.91), with a mean difference  
37 of 310.16 (95% CI: 248.47 to 371.86) minutes;  $t(124) = 9.95, p < .001$ . Table 1 presents  
38 average number of minutes consumed per resource category over a complete cycle of care.  
39  
40  
41  
42  
43  
44  
45  
46

47 INSERT TABLE 1 ABOUT HERE.  
48  
49  
50

### 51 <Costs and cost-minimization>

52  
53 Mean total healthcare costs are reported in Table 1. Taking into account the complete  
54 treatment episode, total estimated cost for ICBT was 463 € (95% CI: 446 € to 480 €) per  
55  
56  
57  
58  
59  
60

1  
2  
3 patient compared with 806 € (95% CI: 730 € to 883 €) for CBGT. Table 1 also presents the  
4  
5 average costs for each resource involved in the complete care episode, where costs of hospital  
6  
7 space, supervision, IT and management has been allocated over each staff category. Estimated  
8  
9 capacity cost rates (cost per minute) were 1.21 €/min for coordinating nurses, 1.02 €/min for  
10  
11 medical secretaries, 1.24 €/min for psychologists, 1.40 €/min for resident physicians and 2.13  
12  
13 €/min for psychiatrists.  
14

15  
16 The estimated cost-saving of ICBT relative to CBGT was -343 € (95% CI: -267  
17  
18 € to -420 €). Confidence-ellipses around the point estimate are showed in Fig. 1. As the 95%  
19  
20 and 75% confidence ellipses occupy both the south-east (SE) and south-west (SW) quadrants,  
21  
22 this indicates that the ICBT treatment was equally effective but less costly relative to the  
23  
24 CBGT intervention; the entire density within the ellipses involves cost-savings.  
25  
26  
27  
28

29  
30 INSERT FIG. 1 ABOUT HERE  
31  
32

### 33 34 <Discussion>

#### 35 36 < Principal findings >

37  
38 The objective of this study was to assess whether ICBT is less costly relative to CBGT in the  
39  
40 treatment of patients with SAD. While clinical treatment effects were equivalent, healthcare  
41  
42 costs were lower in the ICBT group (463 €) compared with the CBGT group (806 €). This  
43  
44 study thus showed that ICBT for SAD is clearly less costly compared to CBGT from a health  
45  
46 care provider perspective. These results add to the previous body of research demonstrating  
47  
48 that ICBT is associated with improved economic outcomes. (25) However, most health  
49  
50 economic evaluations have mainly been performed from a societal perspective. By using a  
51  
52 healthcare provider perspective, and a TDABC costing approach, this study may help to  
53  
54  
55  
56  
57  
58  
59  
60

1  
2  
3 develop a greater understanding of the costs incurred by the resources used throughout the  
4  
5 clinical care of patients and by their administrative processes.  
6  
7

8  
9  
10 *<Implications for policy and practice>*

11 Evidence suggests that ICBT is equally effective as the more commonly provided face-to-face  
12 CBT, not only for SAD (19, 26) but for a wide range of mood and anxiety disorders (27),  
13 while requiring less healthcare resources. Therefore, ICBT may have a number of advantages  
14 that would benefit both health care providers and patients. First, since ICBT requires  
15 significantly less therapist time, each therapist is able to treat more patients simultaneously,  
16 consequentially increasing treatment availability and shortening waiting lists. Another  
17 advantage is that ICBT overcomes geographic barriers for patients and thus to provide access  
18 to evidence based psychological treatment at more equal opportunities. Finally, accessing  
19 therapy sessions online is practical and more economical for patients because it enables them  
20 to work with the treatment at their own convenience, and not having to take time off work for  
21 making visits to their healthcare provider. To further increase access to evidence based  
22 psychological interventions for SAD, ICBT may be considered as an alternative to face-to-  
23 face psychological therapies as an initial step within a stepped care approach. This should also  
24 be considered for other evidence based ICBT applications such as in depression and panic  
25 disorder.  
26  
27  
28  
29  
30  
31  
32  
33  
34  
35  
36  
37  
38  
39  
40  
41  
42  
43  
44  
45  
46

47 *<Strengths and limitations>*

48  
49 The main strengths of the present study were the randomized controlled design, the direct  
50 comparison of ICBT against face-to-face CBT, and the low attrition rates. However, the study  
51 had some limitations.  
52  
53  
54  
55  
56  
57  
58  
59  
60

1  
2  
3 First, the use of TDABC as a costing methodology in healthcare is relatively  
4 new, particularly within mental health care; it has been more commonly used in industry. (28-  
5 30) Therefore, its validity may be difficult to evaluate at this stage. Also, although CBT  
6 treatment delivery may be similar across different healthcare providers, supporting  
7 administrative processes and clinical practices might differ significantly. As a result, it may  
8 be difficult to generalize time and cost estimates of the total healthcare episode to other  
9 settings and healthcare providers.  
10  
11  
12  
13  
14  
15  
16  
17

18 A second limitation relates to difficulties in arriving at accurate time estimates  
19 of resource use and activities performed. Since actual logging of time requires an electronic  
20 measurement system, only accurate timing of the amount of time each psychologist spent with  
21 each patient in ICBT could be recorded (thus providing measures of variability), whereas  
22 other clinical and administrative processes were based on estimated average standard times.  
23  
24  
25  
26  
27  
28

29 Third, parts of the time studies and estimations on resource use were carried out  
30 several years after the original RCT, i.e. when the treatment had been implemented as routine  
31 care. Although administrative routines and processes have remained more or less similar over  
32 the years, there may still be differences when compared to how the administrative processes  
33 were during the RCT.  
34  
35  
36  
37  
38  
39

40 Finally, we will comment on the choice of cost-minimization analysis in the  
41 present study. Economic evaluations in healthcare compare treatment options or technologies  
42 in terms of clinical effects and costs, typically resulting in a cost-effectiveness ratio. The  
43 incremental cost-effectiveness ratio (ICER) summarises the cost-effectiveness of a treatment  
44 relative to an alternative by calculating the difference in costs between the two divided by the  
45 difference in effects (18). We have previously estimated an ICER from a societal perspective  
46 using the formula  $(C_{ICBT} - C_{CBGT}) / (E_{ICBT} - E_{CBGT})$ , where  $C_{ICBT}$  and  $E_{ICBT}$  represents the cost  
47 and effect in the ICBT group and where  $C_{CBGT}$  and  $E_{CBGT}$  represent the cost and effect in the  
48  
49  
50  
51  
52  
53  
54  
55  
56  
57  
58  
59  
60

1  
2  
3 CBGT group (15, 20). Since both treatments were found to have equivalent efficacy,  
4  
5 estimating an ICER may not be the optimal approach in this study as the ICER approaches  
6  
7 infinity when effect difference is close to zero. However, if ICBT can reduce resource use in  
8  
9 treatment of SAD, it may lower healthcare costs. Therefore, a cost-minimization approach  
10  
11 was considered more appropriate in this study.  
12

13  
14  
15  
16 <Conclusion>  
17

18 In treatment of SAD, ICBT is equally effective but is associated with more efficient staff  
19  
20 utilization and considerably lower costs compared with CBGT. From a health care provider  
21  
22 perspective, ICBT is an advantageous treatment option.  
23  
24  
25  
26  
27  
28  
29  
30  
31  
32  
33  
34  
35  
36  
37  
38  
39  
40  
41  
42  
43  
44  
45  
46  
47  
48  
49  
50  
51  
52  
53  
54  
55  
56  
57  
58  
59  
60

1  
2  
3  
4  
5 **Contributions of authors:** SAE designed the study, performed the analyses, collected and  
6  
7 interpreted the data and drafted the paper. EH designed the study, developed the treatment,  
8  
9 performed the analyses, and drafted the paper. NL designed the study, interpreted the data,  
10  
11 and drafted the paper.  
12  
13

14  
15  
16 **Samir El Alaoui**, PhD, Karolinska Institutet, Dept of Clin. Neuroscience, Stockholm,  
17  
18 Sweden, **Erik Hedman**, PhD, Karolinska Institutet, Dept of Clin. Neuroscience, Stockholm,  
19  
20 Sweden & **Nils Lindefors**, PhD, Karolinska Institutet, Dept of Clin. Neuroscience,  
21  
22 Stockholm, Sweden  
23  
24  
25  
26

27 **Correspondence:** Samir El Alaoui, PhD, Department of Clinical Neuroscience (CNS), M58,  
28  
29 Karolinska Universitetssjukhuset, Huddinge 141 86 Stockholm, Sweden.  
30  
31 (samir.el.alaoui@ki.se).  
32  
33  
34  
35

36 **Funding:** This research was funded by Karolinska Institutet and Stockholm County Council,  
37  
38 none of which had any role in the design, execution or publication of the study.  
39  
40  
41  
42

43 **Competing interests:** None declared.  
44  
45  
46  
47

48 **Data sharing statement:** No additional data are available.  
49  
50  
51  
52  
53  
54  
55  
56  
57  
58  
59  
60

Fig. 1. Mean differences in costs and gained health-related quality of life

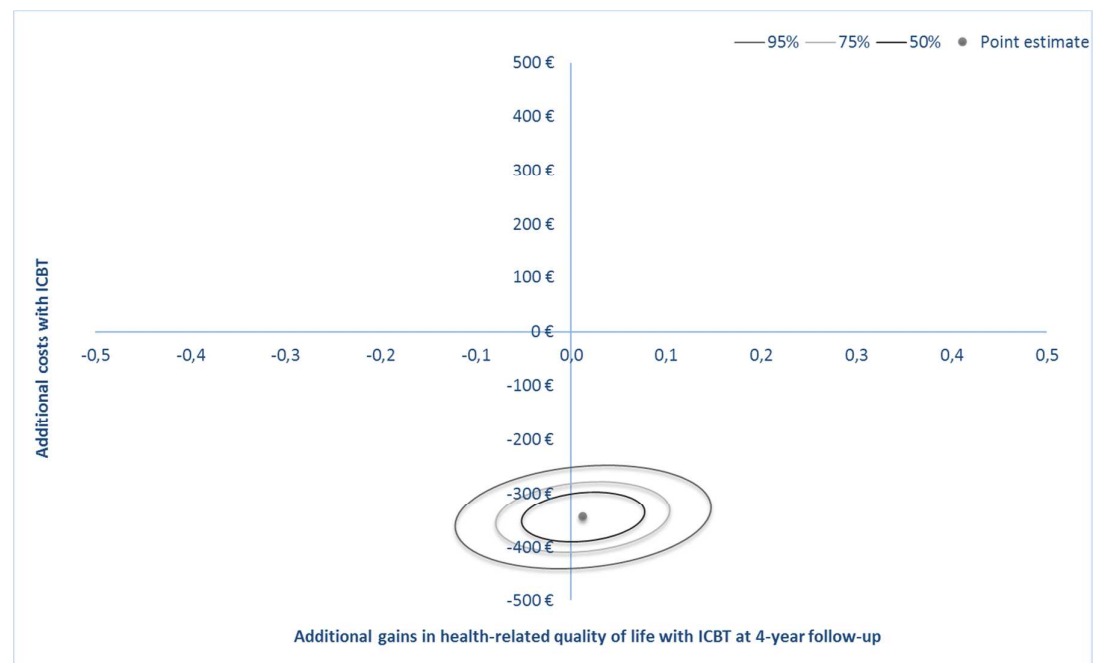

Note. Each confidence-ellipse represents regions with a 50%, 75% or 95% probability of containing the true difference in cost and effect. Abbreviations: ICBT, internet-based cognitive behaviour therapy;



## Tables

**Table 1.** Estimation of a patient's cost over a complete cycle of care for treating social anxiety disorder with ICBT or with CBGT

|                                                | Coordinating nurse |              | Psychiatrist    |              | Resident physician |              | Psychologist    |              | Medical secretary |              | Total           |              |
|------------------------------------------------|--------------------|--------------|-----------------|--------------|--------------------|--------------|-----------------|--------------|-------------------|--------------|-----------------|--------------|
|                                                | Average minutes    | Average cost | Average minutes | Average cost | Average minutes    | Average cost | Average minutes | Average cost | Average minutes   | Average cost | Average minutes | Average cost |
| <b>ICBT</b>                                    |                    |              |                 |              |                    |              |                 |              |                   |              |                 |              |
| Registration and Verification                  | 11                 | 13€          | 0               | 0€           | 0                  | 0€           | 0               | 0€           | 0                 | 0€           | 11              | 13€          |
| Diagnostic assessment                          | 0                  | 0€           | 20              | 43€          | 80                 | 112€         | 0               | 0€           | 0                 | 0€           | 100             | 154€         |
| Supervision meeting / discussion               | 0                  | 0€           | 3               | 6€           | 3                  | 4€           | 1               | 1€           | 0                 | 0€           | 7               | 11€          |
| Supplementary psychological assessment         | 0                  | 0€           | 0               | 0€           | 0                  | 0€           | 5               | 7€           | 0                 | 0€           | 5               | 7€           |
| Administrating treatment activation            | 0                  | 0€           | 0               | 0€           | 0                  | 0€           | 0               | 0€           | 41                | 41€          | 41              | 41€          |
| ICBT intervention (online)                     | 0                  | 0€           | 0               | 0€           | 0                  | 0€           | 82              | 102€         | 0                 | 0€           | 82              | 102€         |
| ICBT intervention (offline)                    | 0                  | 0€           | 0               | 0€           | 0                  | 0€           | 77              | 95€          | 0                 | 0€           | 77              | 95€          |
| Administrative preparation for follow-up visit | 3                  | 3€           | 0               | 0€           | 0                  | 0€           | 0               | 0€           | 0                 | 0€           | 3               | 3€           |
| Post-treatment clinical visit                  | 0                  | 0€           | 0               | 0€           | 0                  | 0€           | 24              | 30€          | 0                 | 0€           | 24              | 30€          |
| Discharge                                      | 0                  | 0€           | 0               | 0€           | 0                  | 0€           | 0               | 0€           | 5                 | 5€           | 5               | 5€           |
| <b>Total</b>                                   | <b>14</b>          | <b>17€</b>   | <b>23</b>       | <b>49€</b>   | <b>83</b>          | <b>116€</b>  | <b>190</b>      | <b>235€</b>  | <b>46</b>         | <b>46€</b>   | <b>355</b>      | <b>463€</b>  |
| <b>CBGT</b>                                    |                    |              |                 |              |                    |              |                 |              |                   |              |                 |              |
| Registration and Verification                  | 11                 | 13€          | 0               | 0€           | 0                  | 0€           | 0               | 0€           | 0                 | 0€           | 11              | 13€          |
| Diagnostic assessment                          | 0                  | 0€           | 20              | 43€          | 80                 | 112€         | 0               | 0€           | 0                 | 0€           | 100             | 154€         |
| Supervision meeting / discussion               | 0                  | 0€           | 3               | 6€           | 3                  | 4€           | 1               | 1€           | 0                 | 0€           | 7               | 11€          |
| Supplementary psychological assessment         | 0                  | 0€           | 0               | 0€           | 0                  | 0€           | 5               | 7€           | 0                 | 0€           | 5               | 7€           |

|                                                |           |            |           |            |           |             |            |             |          |           |            |             |
|------------------------------------------------|-----------|------------|-----------|------------|-----------|-------------|------------|-------------|----------|-----------|------------|-------------|
| CBGT intervention                              | 0         | 0€         | 0         | 0€         | 0         | 0€          | 470        | 582€        | 0        | 0€        | 470        | 582€        |
| Administrative preparation for follow-up visit | 3         | 3€         | 0         | 0€         | 0         | 0€          | 0          | 0€          | 0        | 0€        | 3          | 3€          |
| Post-treatment clinical visit                  | 0         | 0€         | 0         | 0€         | 0         | 0€          | 24         | 30€         | 0        | 0€        | 24         | 30€         |
| Discharge                                      | 0         | 0€         | 0         | 0€         | 0         | 0€          | 0          | 0€          | 5        | 5€        | 5          | 5€          |
| <b>Total</b>                                   | <b>14</b> | <b>17€</b> | <b>23</b> | <b>49€</b> | <b>83</b> | <b>116€</b> | <b>500</b> | <b>619€</b> | <b>5</b> | <b>5€</b> | <b>625</b> | <b>806€</b> |

## References

1. Bebbington P, Brugha T, Coid J, Crawford M, Deverill C, D'Souza J, et al. Adult Psychiatric Morbidity in England, 2007: Results of a Household Survey. Social Care Statistics. 2009.
2. The economic and social costs of mental health problems in 2009/10. Centre for Mental Health, 2010.
3. Kessler RC, Chiu WT, Demler O, Merikangas KR, Walters EE. Prevalence, severity, and comorbidity of 12-month DSM-IV disorders in the National Comorbidity Survey Replication. *Arch Gen Psychiatry*. 2005; 62(6): 617-27.
4. Ruscio AM, Brown TA, Chiu WT, Sareen J, Stein MB, Kessler RC. Social fears and social phobia in the USA: results from the National Comorbidity Survey Replication. *Psychol Med*. 2008; 38(1): 15-28.
5. Grant BF, Hasin DS, Blanco C, Stinson FS, Chou SP, Goldstein RB, et al. The epidemiology of social anxiety disorder in the United States: results from the National Epidemiologic Survey on Alcohol and Related Conditions. *The Journal of clinical psychiatry*. 2005; 66(11): 1351-61.
6. Kessler RC, Chiu WT, Demler O, Walters EE. Prevalence, Severity, and Comorbidity of 12-Month DSM-IV Disorders in the National Comorbidity Survey Replication. *Arch Gen Psychiatry*. 2005; 62(6): 617-27.
7. Kessler RC, Berglund P, Demler O, Jin R, Merikangas KR, Walters EE. Lifetime prevalence and age-of-onset distributions of DSM-IV disorders in the National Comorbidity Survey Replication. *Arch Gen Psychiatry*. 2005; 62(6): 593-602.
8. Wittchen HU, Fehm L. Epidemiology and natural course of social fears and social phobia. *Acta Psychiatr Scand Suppl*. 2003; (417): 4-18.
9. Yonkers KA, Dyck IR, Keller MB. An eight-year longitudinal comparison of clinical course and characteristics of social phobia among men and women. *Psychiatr Serv*. 2001; 52(5): 637-43.
10. Health NCCfM. Social anxiety disorder: recognition, assessment and treatment. In: National Clinical Guideline Number 159: 2013.
11. Heimberg RG, Dodge CS, Hope DA, Kennedy CR, Zollo LJ, Becker RE. Cognitive behavioral group treatment for social phobia: Comparison with a credible placebo control. *Cognitive Ther Res*. 1990; 14(1): 1-23.
12. Blanco C, Heimberg RG, Schneier FR, Fresco DM, Chen H, Turk CL, et al. A Placebo-Controlled Trial of Phenelzine, Cognitive Behavioral Group Therapy, and Their Combination for Social Anxiety Disorder. *Arch Gen Psychiatry*. 2010; 67(3): 286-95.
13. Cavanagh K. Geographic Inequity in the Availability of Cognitive Behavioural Therapy in England and Wales: A 10-Year Update. *Behav Cogn Psychother*. 2013: 1-5.
14. Hedman E, Ljótsson B, Lindfors N. Cognitive behavior therapy via the Internet: a systematic review of applications, clinical efficacy and cost-effectiveness. *Expert Rev Pharmacoecon Outcomes Res*. 2012; 12(6): 745-64.
15. Hedman E, Andersson E, Ljotsson B, Andersson G, Ruck C, Lindfors N. Cost-effectiveness of Internet-based cognitive behavior therapy vs. cognitive behavioral group therapy for social anxiety disorder: results from a randomized controlled trial. *Behaviour research and therapy*. 2011; 49(11): 729-36.

## HEALTH ECONOMIC EVALUATION OF ICBT FOR SAD

16. Titov N, Andrews G, Johnston L, Schwencke G, Choi I. Shyness programme: longer term benefits, cost-effectiveness, and acceptability. *The Australian and New Zealand journal of psychiatry*. 2009; 43(1): 36-44.
17. Dakin H, Wordsworth S. Cost-Minimisation Analysis Versus Cost-Effectiveness Analysis, Revisited. *Health Econ*. 2013; 22(1): 22-34.
18. Drummond MF. *Methods for the economic evaluation of health care programmes*. Oxford University Press, 2005.
19. Hedman E, Andersson G, Ljotsson B, Andersson E, Ruck C, Mortberg E, et al. Internet-based cognitive behavior therapy vs. cognitive behavioral group therapy for social anxiety disorder: a randomized controlled non-inferiority trial. *PloS one*. 2011; 6(3): e18001.
20. Hedman E, El Alaoui S, Lindefors N, Andersson E, Ruck C, Ghaderi A, et al. Clinical effectiveness and cost-effectiveness of Internet- vs. group-based cognitive behavior therapy for social anxiety disorder: 4-Year follow-up of a randomized trial. *Behaviour research and therapy*. 2014; 59C: 20-9.
21. Clark DM, Wells A. A cognitive model of social phobia. In: *Social phobia: Diagnosis, assessment and treatment*. Guilford press, 1995.
22. Carlbring P, Gunnarsdottir M, Hedensjo L, Andersson G, Ekselius L, Furmark T. Treatment of social phobia: randomised trial of internet-delivered cognitive-behavioural therapy with telephone support. *The British journal of psychiatry : the journal of mental science*. 2007; 190: 123-8.
23. Tillfors M, Carlbring P, Furmark T, Lewenhaupt S, Spak M, Eriksson A, et al. Treating university students with social phobia and public speaking fears: Internet delivered self-help with or without live group exposure sessions. *Depression and anxiety*. 2008; 25(8): 708-17.
24. Kaplan RS, Anderson SR. Time-driven activity-based costing. *Harvard Bus Rev*. 2004; 82(11): 131-+.
25. Hedman E, Ljotsson B, Lindefors N. Cognitive behavior therapy via the Internet: a systematic review of applications, clinical efficacy and cost-effectiveness. *Expert review of pharmacoeconomics & outcomes research*. 2012; 12(6): 745-64.
26. Andrews G, Davies M, Titov N. Effectiveness randomized controlled trial of face to face versus Internet cognitive behaviour therapy for social phobia. *The Australian and New Zealand journal of psychiatry*. 2011; 45(4): 337-40.
27. Andersson G, Cuijpers P, Carlbring P, Riper H, Hedman E. Guided Internet-based vs. face-to-face cognitive behavior therapy for psychiatric and somatic disorders: a systematic review and meta-analysis. *World psychiatry : official journal of the World Psychiatric Association*. 2014; 13(3): 288-95.
28. Eldenburg L, Krishan R. Management accounting and control in health care: an economic perspective. In: *Handbook of management accounting research* (eds C Chapman, A Hopwood, M Shields): 859-83. Elsevier, 2007.
29. Kaplan RS, Porter ME. How to Solve The Cost Crisis In Health Care. *Harvard Bus Rev*. 2011; 89(9): 46-+.
30. McLaughlin N, Burke MA, Setlur NP, Niedzwiecki DR, Kaplan AL, Saigal C, et al. Time-driven activity-based costing: a driver for provider engagement in costing activities and redesign initiatives. *Neurosurg Focus*. 2014; 37(5).

1  
2  
3  
4  
5  
6  
7  
8  
9  
10  
11  
12  
13  
14  
15  
16  
17  
18  
19  
20  
21  
22  
23  
24  
25  
26  
27  
28  
29  
30  
31  
32  
33  
34  
35  
36  
37  
38  
39  
40  
41  
42  
43  
44  
45  
46  
47

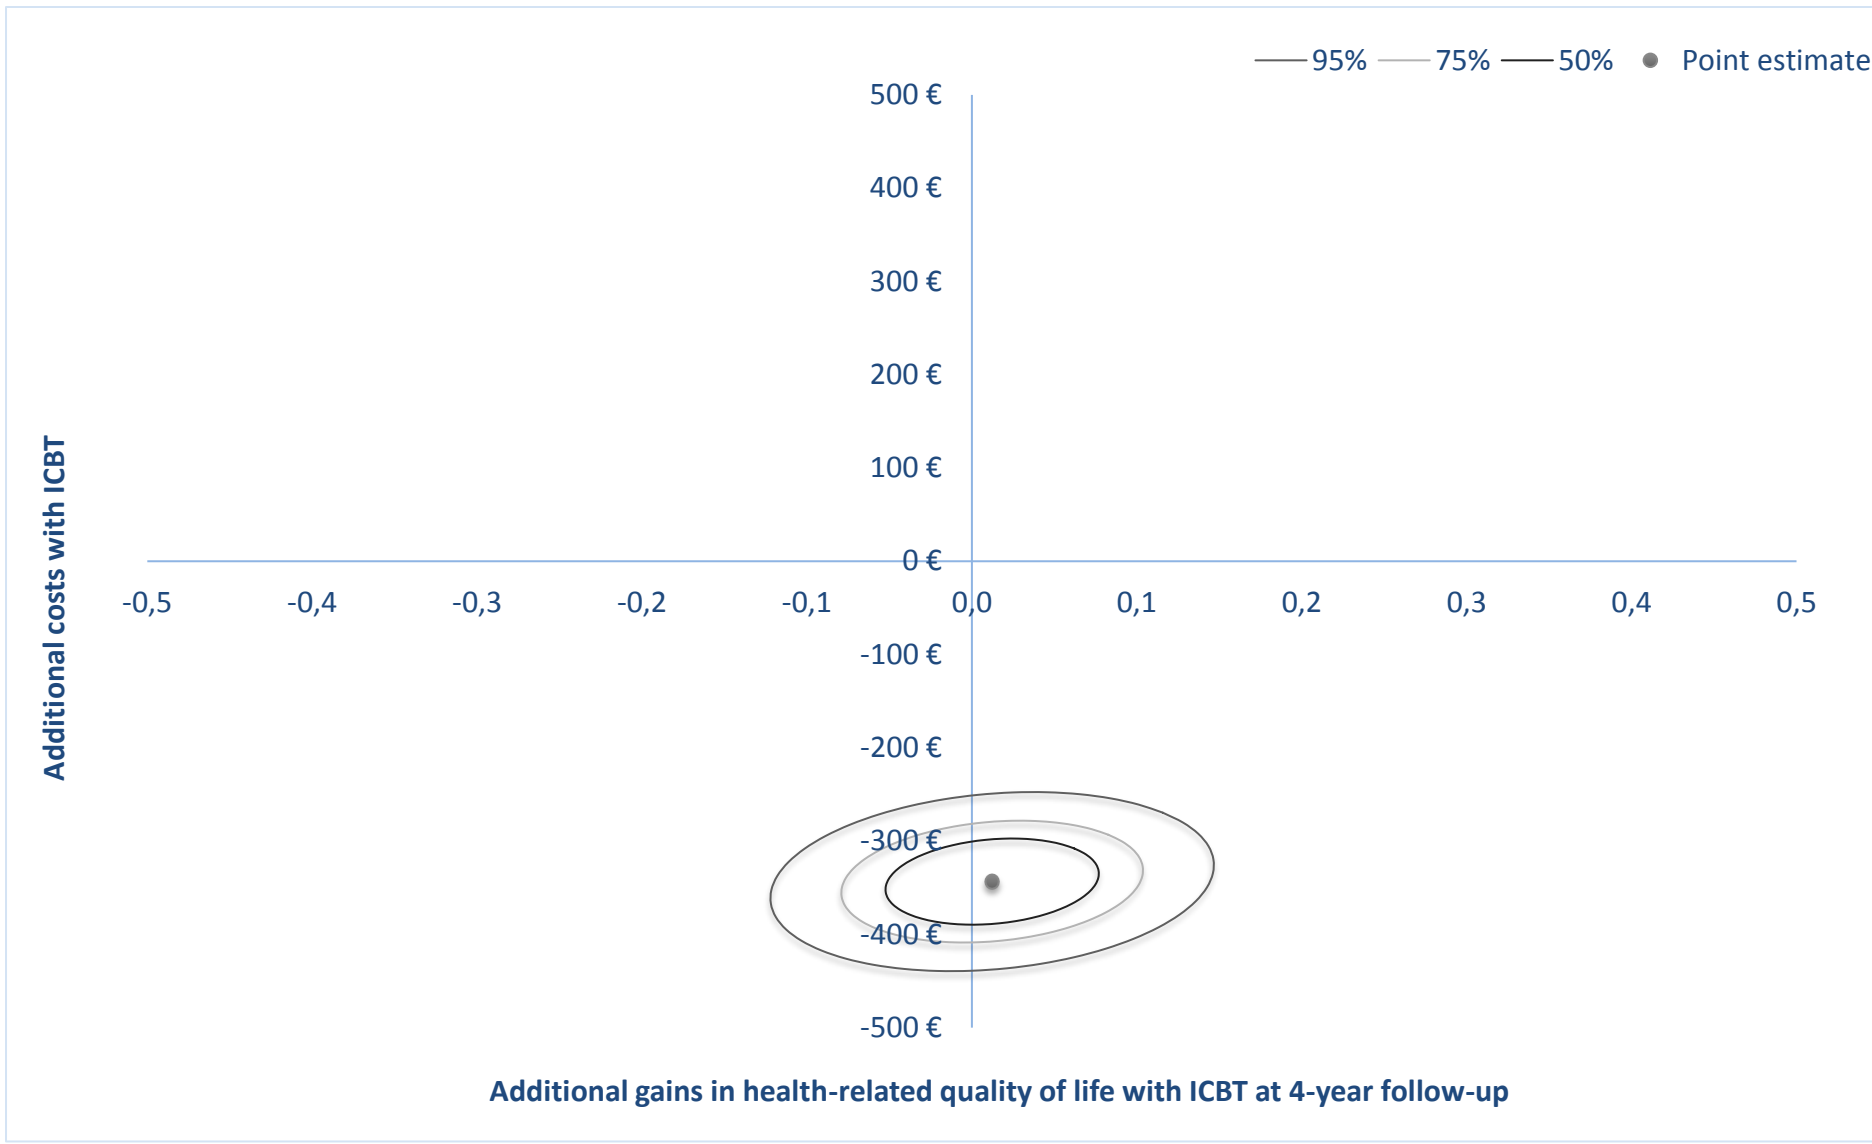

## CHEERS checklist—Items to include when reporting economic evaluations of health interventions

| Section/item                                           | Item No | Recommendation                                                                                                                                                                                                                                                                                                               | Reported on page No/<br>line No   |
|--------------------------------------------------------|---------|------------------------------------------------------------------------------------------------------------------------------------------------------------------------------------------------------------------------------------------------------------------------------------------------------------------------------|-----------------------------------|
| <b>Title and abstract</b>                              |         |                                                                                                                                                                                                                                                                                                                              |                                   |
| Title                                                  | 1       | Identify the study as an economic evaluation or use more specific terms such as “cost-effectiveness analysis”, and describe the interventions compared.                                                                                                                                                                      | page 1, line 2                    |
| Abstract                                               | 2       | Provide a structured summary of objectives, perspective, setting, methods (including study design and inputs), results (including base case and uncertainty analyses), and conclusions.                                                                                                                                      | page 2, line 1 to 24              |
| <b>Introduction</b>                                    |         |                                                                                                                                                                                                                                                                                                                              |                                   |
| Background and objectives                              | 3       | Provide an explicit statement of the broader context for the study.                                                                                                                                                                                                                                                          | page 3, line 7 to page 4, line 18 |
|                                                        |         | Present the study question and its relevance for health policy or practice decisions.                                                                                                                                                                                                                                        | page 4, line 9 to 18              |
| <b>Methods</b>                                         |         |                                                                                                                                                                                                                                                                                                                              |                                   |
| Target population and subgroups                        | 4       | Describe characteristics of the base case population and subgroups analysed, including why they were chosen.                                                                                                                                                                                                                 | page 4, line 20 and continued.    |
| Setting and location                                   | 5       | State relevant aspects of the system(s) in which the decision(s) need(s) to be made.                                                                                                                                                                                                                                         | page 4, line 20 and continued.    |
| Study perspective                                      | 6       | Describe the perspective of the study and relate this to the costs being evaluated.                                                                                                                                                                                                                                          | page 6, line 21 and continued.    |
| Comparators                                            | 7       | Describe the interventions or strategies being compared and state why they were chosen.                                                                                                                                                                                                                                      | page 4, line 20 and continued     |
| Time horizon                                           | 8       | State the time horizon(s) over which costs and consequences are being evaluated and say why appropriate.                                                                                                                                                                                                                     | page 5, line 1                    |
| Discount rate                                          | 9       | Report the choice of discount rate(s) used for costs and outcomes and say why appropriate.                                                                                                                                                                                                                                   | page 7, line 11                   |
| Choice of health outcomes                              | 10      | Describe what outcomes were used as the measure(s) of benefit in the evaluation and their relevance for the type of analysis performed.                                                                                                                                                                                      | page 6, line 9                    |
| Measurement of effectiveness                           | 11a     | <i>Single study-based estimates</i> : Describe fully the design features of the single effectiveness study and why the single study was a sufficient source of clinical effectiveness data.                                                                                                                                  | page 7, line 24                   |
|                                                        | 11b     | <i>Synthesis-based estimates</i> : Describe fully the methods used for identification of included studies and synthesis of clinical effectiveness data.                                                                                                                                                                      |                                   |
| Measurement and valuation of preference based outcomes | 12      | If applicable, describe the population and methods used to elicit preferences for outcomes.                                                                                                                                                                                                                                  | not applicable                    |
| Estimating resources and costs                         | 13a     | <i>Single study-based economic evaluation</i> : Describe approaches used to estimate resource use associated with the alternative interventions. Describe primary or secondary research methods for valuing each resource item in terms of its unit cost. Describe any adjustments made to approximate to opportunity costs. |                                   |

| Section/item                                                         | Item No | Recommendation                                                                                                                                                                                                                                                                                                                                        | Reported on page No/<br>line No       |
|----------------------------------------------------------------------|---------|-------------------------------------------------------------------------------------------------------------------------------------------------------------------------------------------------------------------------------------------------------------------------------------------------------------------------------------------------------|---------------------------------------|
|                                                                      | 13b     | <i>Model-based economic evaluation:</i> Describe approaches and data sources used to estimate resource use associated with model health states. Describe primary or secondary research methods for valuing each resource item in terms of its unit cost. Describe any adjustments made to approximate to opportunity costs.                           | not applicable                        |
| Currency, price date, and conversion                                 | 14      | Report the dates of the estimated resource quantities and unit costs. Describe methods for adjusting estimated unit costs to the year of reported costs if necessary. Describe methods for converting costs into a common currency base and the exchange rate.                                                                                        | page 7, line 12                       |
| Choice of model                                                      | 15      | Describe and give reasons for the specific type of decision-analytical model used. Providing a figure to show model structure is strongly recommended.                                                                                                                                                                                                | page 7, line 14                       |
| Assumptions                                                          | 16      | Describe all structural or other assumptions underpinning the decision-analytical model.                                                                                                                                                                                                                                                              |                                       |
| Analytical methods                                                   | 17      | Describe all analytical methods supporting the evaluation. This could include methods for dealing with skewed, missing, or censored data; extrapolation methods; methods for pooling data; approaches to validate or make adjustments (such as half cycle corrections) to a model; and methods for handling population heterogeneity and uncertainty. | page 7, line 19                       |
| <b>Results</b>                                                       |         |                                                                                                                                                                                                                                                                                                                                                       |                                       |
| Study parameters                                                     | 18      | Report the values, ranges, references, and, if used, probability distributions for all parameters. Report reasons or sources for distributions used to represent uncertainty where appropriate. Providing a table to show the input values is strongly recommended.                                                                                   | page 8, lines 11 to 24                |
| Incremental costs and outcomes                                       | 19      | For each intervention, report mean values for the main categories of estimated costs and outcomes of interest, as well as mean differences between the comparator groups. If applicable, report incremental cost-effectiveness ratios.                                                                                                                | figure 1;<br>page 8, lines 11 to 24   |
| Characterising uncertainty                                           | 20a     | <i>Single study-based economic evaluation:</i> Describe the effects of sampling uncertainty for the estimated incremental cost and incremental effectiveness parameters, together with the impact of methodological assumptions (such as discount rate, study perspective).                                                                           | figure 1                              |
|                                                                      | 20b     | <i>Model-based economic evaluation:</i> Describe the effects on the results of uncertainty for all input parameters, and uncertainty related to the structure of the model and assumptions.                                                                                                                                                           | not applicable                        |
| Characterising heterogeneity                                         | 21      | If applicable, report differences in costs, outcomes, or cost-effectiveness that can be explained by variations between subgroups of patients with different baseline characteristics or other observed variability in effects that are not reducible by more information.                                                                            | not applicable                        |
| <b>Discussion</b>                                                    |         |                                                                                                                                                                                                                                                                                                                                                       |                                       |
| Study findings, limitations, generalisability, and current knowledge | 22      | Summarise key study findings and describe how they support the conclusions reached. Discuss limitations and the generalisability of the findings and how the findings fit with current knowledge.                                                                                                                                                     | page 9, line 3 to<br>page 11, line 21 |

| Section/item          | Item No | Recommendation                                                                                                                                                                                                                                    | Reported on page No/<br>line No                |
|-----------------------|---------|---------------------------------------------------------------------------------------------------------------------------------------------------------------------------------------------------------------------------------------------------|------------------------------------------------|
| <b>Other</b>          |         |                                                                                                                                                                                                                                                   |                                                |
| Source of funding     | 23      | Describe how the study was funded and the role of the funder in the identification, design, conduct, and reporting of the analysis. Describe other non-monetary sources of support.                                                               | page 12, line 16                               |
| Conflicts of interest | 24      | Describe any potential for conflict of interest of study contributors in accordance with journal policy. In the absence of a journal policy, we recommend authors comply with International Committee of Medical Journal Editors recommendations. | Information provided via the submission system |

For consistency, the CHEERS statement checklist format is based on the format of the CONSORT statement checklist



# BMJ Open

## Does internet-based cognitive behaviour therapy reduce healthcare costs and resource use in treatment of social anxiety disorder? A cost- minimisation analysis conducted alongside a randomized controlled trial

|                                 |                                                                                                                                                                                                                                                                                                                                                   |
|---------------------------------|---------------------------------------------------------------------------------------------------------------------------------------------------------------------------------------------------------------------------------------------------------------------------------------------------------------------------------------------------|
| Journal:                        | <i>BMJ Open</i>                                                                                                                                                                                                                                                                                                                                   |
| Manuscript ID                   | bmjopen-2017-017053.R1                                                                                                                                                                                                                                                                                                                            |
| Article Type:                   | Research                                                                                                                                                                                                                                                                                                                                          |
| Date Submitted by the Author:   | 01-Jun-2017                                                                                                                                                                                                                                                                                                                                       |
| Complete List of Authors:       | El Alaoui, Samir; Karolinska Institutet, Department of Clinical Neuroscience<br>Hedman, Erik; Karolinska Institutet, Department of Clinical Neuroscience<br>Ljótsson, Brjánn; Karolinska Institutet, Department of Clinical<br>Neuroscience, Division of Psychology<br>Lindfors, Nils; Karolinska Institutet, Department of Clinical Neuroscience |
| <b>Primary Subject Heading</b>: | Mental health                                                                                                                                                                                                                                                                                                                                     |
| Secondary Subject Heading:      | Health economics                                                                                                                                                                                                                                                                                                                                  |
| Keywords:                       | MENTAL HEALTH, PSYCHIATRY, Anxiety disorders < PSYCHIATRY                                                                                                                                                                                                                                                                                         |
|                                 |                                                                                                                                                                                                                                                                                                                                                   |

SCHOLARONE™  
Manuscripts

1  
2  
3 **Does internet-based cognitive behaviour therapy reduce healthcare costs and resource**  
4 **use in treatment of social anxiety disorder? A cost-minimisation analysis conducted**  
5 **alongside a randomized controlled trial**  
6  
7  
8  
9

10  
11  
12  
13  
14 Samir El Alaoui, PhD; Erik Hedman, PhD, Brjánn Ljótsson, PhD, and Nils Lindefors, MD,  
15  
16 PhD  
17  
18  
19

20  
21 **Author Affiliations:** Department of Clinical Neuroscience, Division of Psychiatry,  
22  
23 Karolinska Institutet, Stockholm, Sweden (Dr El Alaoui, Dr Lindefors); Department of  
24  
25 Clinical Neuroscience, Osher Center for Integrative Medicine, Karolinska Institutet,  
26  
27 Stockholm, Sweden (Dr Hedman); Department of Clinical Neuroscience, Division of  
28  
29 Psychology, Karolinska Institutet, Stockholm, Sweden (Dr Hedman and Dr Ljótsson)  
30  
31  
32  
33

34 **Corresponding Author:** Samir El Alaoui, PhD, Department of Clinical Neuroscience (CNS),  
35  
36 M58, Karolinska Universitetssjukhuset, Huddinge 141 86 Stockholm, Sweden  
37  
38  
39

40  
41 Email: [samir.el.alaoui@ki.se](mailto:samir.el.alaoui@ki.se)  
42  
43  
44

45 Word count: 3067 (main text); 288 (abstract)  
46

47 Tables: 2  
48

49 Figures: 3  
50  
51  
52  
53  
54  
55  
56  
57  
58  
59  
60

## Abstract

**Objectives:** Social anxiety disorder (SAD) can be effectively treated with internet-delivered cognitive behavioural therapy (ICBT), but studies on long-term cost-minimisation from a healthcare provider perspective in comparison to an evidence-based control treatment of therapeutic equivalence are lacking. The objective of the study was to determine whether ICBT reduces healthcare costs and use of healthcare resources compared to cognitive behavioural group therapy (CBGT).

**Design:** A cost-minimisation study alongside an RCT where participants (N=126) with SAD were randomised to ICBT or to CBGT. Costs measured from a healthcare provider perspective were estimated using time-driven activity based costing alongside health status over four years from baseline measured with EQ-5D.

**Setting:** A psychiatric outpatient clinic in Stockholm, Sweden.

**Participants:** Participants were 126 individuals with social anxiety disorder.

**Primary outcome measures:** Changes in EQ-5D and costs.

**Interventions:** Participants received either CBGT or ICBT for a duration of 15 weeks.

**Results:** ICBT minimized total treatment costs. Mean improvement in health status ( $d = -0.36$  to  $-0.25$ ) was equivalent in both treatments over the study period, while healthcare costs were lower in ICBT (463 €, 95% CI: 446 € to 480 €) compared with CBGT (806 € (95% CI: 730 €

1  
2  
3 to 883 €). Mean use of effective psychologist time in ICBT was 189.60 (SD = 53.77) minutes  
4  
5 compared to 499.78 (SD = 30.91) in the CBGT group.  
6  
7

8  
9  
10 **Conclusions:** In treatment of SAD, ICBT is equally effective but is associated with more  
11 efficient staff utilization and less costs compared with CBGT. From a health care provider  
12 perspective, ICBT is an advantageous treatment option.  
13  
14

### 15 16 17 18 **Strengths and limitations of this study** 19

- 20 • Randomized controlled design.
- 21 • Low attrition rates.
- 22 • Includes long-term follow-up data.
- 23 • It may be difficult to generalize time and cost estimates of resource use to other  
24 settings.  
25  
26  
27  
28  
29  
30  
31  
32  
33

### 34 **<Introduction>** 35 36 37

38 Common mental health problems including depression and anxiety disorders are a major  
39 concern globally, and in the UK affecting approximately 17% of the population (1). The cost  
40 of these problems in England alone has been estimated at £105.2 billion (approximately 121  
41 billion Euros) which includes costs associated with reduced health-related quality of life, lost  
42 productivity and social and health care costs (2). Social anxiety disorder (SAD) is one of the  
43 most prevalent anxiety disorders with a 12-month prevalence of 2.8%-7.1% and a lifetime  
44 prevalence of 5%-12.1% (3-5). SAD is associated with functional impairment and typically  
45 follows a chronic course if untreated (6-9). The National Institute for Health and Care  
46 Excellence (NICE) in the UK recommends cognitive behavioural therapy (CBT) as the first-  
47  
48  
49  
50  
51  
52  
53  
54  
55  
56  
57  
58  
59  
60

1  
2  
3 line treatment option for SAD (10). Cognitive behavioural group therapy (CBGT) is an  
4  
5 effective format of CBT provision in the treatment of SAD (11, 12). Although many patients  
6  
7 prefer psychological therapies to medication, access is limited in both primary and secondary  
8  
9 care (13).  
10

11  
12 Recently, Internet-based cognitive behaviour therapy (ICBT) has emerged as an  
13  
14 empirically supported treatment for SAD with effect sizes on par with those of CBGT and  
15  
16 tested in at least 16 randomized controlled trials (14). Our research group has previously  
17  
18 compared ICBT to CBGT in a non-inferiority trial and found ICBT to be at least as effective  
19  
20 as CBGT (15). At post-treatment, it was observed that 55% (95% CI, 42.5%–66.9%) of  
21  
22 patients having received ICBT were classified as responders, compared to 34% (95% CI,  
23  
24 22.1%–45.7%) having received CBGT. At six-month follow-up, the corresponding numbers  
25  
26 were 64% (95% CI, 52.3%–75.8%) in the ICBT group and 45% (95% CI, 32.8%–57.6%) in  
27  
28 the CBGT group.  
29  
30

31  
32 Even though some previous studies indicate that ICBT for SAD can be cost-  
33  
34 effective (16, 17), evidence is lacking concerning health economic evaluations from a health  
35  
36 care provider perspective. In the present study, we used the time-driven activity based costing  
37  
38 method, which takes into account all costs related to the treatment from the health care  
39  
40 provider's perspective. To our knowledge, this has not been previously done when evaluating  
41  
42 ICBT for SAD.  
43  
44

45  
46 In health economic evaluations, a choice is often made between four types of  
47  
48 methods: a cost-benefit analysis (CBA) in which both benefits and costs are expressed in  
49  
50 monetary terms; a cost-effectiveness analysis (CEA) where costs and treatment effects are  
51  
52 compared; a cost-utility analysis which is similar to CBA and CEA but where benefits is  
53  
54 expressed in terms of quality-adjusted life years (QALYs); and finally, cost-minimisation  
55  
56  
57  
58  
59  
60

1  
2  
3 analysis (CMA), which focuses on comparing the costs of different treatments with  
4  
5 previously demonstrated equivalence in clinical efficacy.  
6

7  
8 Given the equivalence of both treatment formats in terms of health  
9  
10 improvements previously demonstrated in a randomized controlled trial (15), the purpose of  
11  
12 this study was to assess whether ICBT may help minimize the costs of healthcare use relative  
13  
14 to CBGT. This was done by using both data from a randomized controlled trial and  
15  
16 additionally collected data on resource use. In contrast to previous health economic  
17  
18 evaluations (16, 18), the present study adopted a health care provider perspective using time-  
19  
20 driven activity based costing (TDABC) methodology. If ICBT is found to help minimize the  
21  
22 costs of healthcare use relative to CBGT, such internet-based interventions have the potential  
23  
24 to increase access to psychological therapy in psychiatry and primary care and could represent  
25  
26 an efficient alternative psychological treatment for SAD.  
27  
28

### 31 32 <Method>

#### 33 34 <Design>

35  
36 This was a cost-minimisation analysis adopting a healthcare provider perspective, conducted  
37  
38 alongside a non-inferiority trial within the context of a parallel group study with unrestricted  
39  
40 randomization in 1:1 ratio (ICBT or CBGT). Costs measured from a healthcare provider  
41  
42 perspective were estimated using time-driven activity based costing alongside with health  
43  
44 status over four years from baseline measured with EQ-5D. All costs were estimated based on  
45  
46 thorough assessment of the costs associated with ICBT when delivered in regular care (which  
47  
48 was implemented at the clinic after the RCT); this was done in order not to underestimate the  
49  
50 treatment costs. The trial was registered at clinicaltrials.gov (identifier NCT00564967). The  
51  
52 main outcome study has been reported elsewhere (15).  
53  
54  
55  
56  
57  
58  
59  
60

1  
2  
3 <Recruitment, inclusion criteria and participants>  
4

5 The study was conducted at a public ICBT unit in Stockholm, Sweden (Stockholm Health  
6 Care Services). Participants were recruited by self-referral (n = 97) or by referral from  
7 primary care physicians and psychiatrists (n = 29). The study protocol was approved by the  
8 Regional Ethical Review Board in Stockholm and informed consent was obtained from all  
9 participants. The recruitment took place between 2007 and 2009. The participant flow  
10 throughout the trial is presented in the main outcome study (15).  
11  
12  
13  
14  
15  
16  
17  
18  
19

20  
21 <Treatments>

22  
23 ≤ Internet-based cognitive behaviour therapy (ICBT)>

24 The internet-delivered treatment was based on and adapted from a treatment originally  
25 developed by Andersson and colleagues and followed a CBT model developed for individual  
26 therapy of SAD (19-21). The treatment content was accessed as text modules similar to  
27 chapters in self-help bibliotherapy. Each chapter corresponded to a CBT session with a  
28 specific theme such as cognitive restructuring, graded exposure or behavioral experiments,  
29 coupled with homework assignments. Patients received supportive email feedback from a  
30 psychologist after each module. The duration of the internet-based intervention was 15 weeks,  
31 and therapists were instructed to restrict time spent on each patient to approximately 10  
32 minutes per week.  
33  
34  
35  
36  
37  
38  
39  
40  
41  
42  
43  
44  
45  
46

47 ≤ Cognitive behavioural group therapy (CBGT)>

48 The group CBT for SAD followed the protocol developed by Heimberg and Becker (2002).  
49 The treatment was equally long as the ICBT (i.e. 15 weeks) consisting of one initial  
50 individual session followed by 14 group sessions. Each session was 2.5 hours long and led by  
51 therapists trained in CBT. Each group consisted of six to seven patients.  
52  
53  
54  
55  
56  
57  
58  
59  
60

1  
2  
3  
4  
5 <Outcome measure>  
6

7 EuroQol (EQ-5D) index values were used to assess improvements in health-related quality of  
8 life (EuroQol-Group, 1990). The EQ-5D is non-disease specific and measures five health  
9 domains of importance to quality of life: mobility, self-care, usual activities, pain/discomfort  
10 and anxiety/depression.  
11  
12  
13  
14  
15

16  
17  
18 <Resource use>  
19

20 Resource use was estimated by using a bottom-up approach where the clinical and  
21 administrative activities performed throughout the treatment delivery cycle were first  
22 documented through process maps. This allowed us to identify resource use in terms of type  
23 (e.g. personnel, hospital space, IT) and time (measured in minutes and collected through time  
24 studies and interviews). The time studies and estimations on resource use were conducted at  
25 the treatment facility after the original RCT had been completed, i.e. when the treatment had  
26 been implemented as routine care.  
27  
28  
29  
30  
31  
32  
33  
34  
35  
36  
37

38 <Costs>  
39

40 TDABC was used to determine the costs associated with ICBT and CBGT from a healthcare  
41 provider perspective (22). Based on estimated resource use (described above), the capacity  
42 cost rate (i.e. cost per minute) was calculated for each resource. The overall approach for  
43 calculating capacity cost rates for each resource involved the allocating of costs such as  
44 hospital space, supervision, IT (computers, email, services, etc.) and management evenly per  
45 minute. Costs for hospital space were calculated as the square meter price divided by floor  
46 space per staff category and joint surfaces were then allocated. Shared costs included  
47  
48  
49  
50  
51  
52  
53  
54  
55  
56  
57  
58  
59  
60



1  
2  
3 management as well as shared unit administration. Finally, hospital costs for security and  
4  
5 safety were also included.  
6

7 The minute-cost for a psychologist was calculated by dividing the total annual  
8 salary by the total number of minutes worked. Since not all time worked was available for  
9 clinical care due to meetings, training and breaks etc., the practical capacity of each staff  
10 category was estimated to be 80% of the actual number of worked hours, which is typically  
11 used as a standard assumption (22). Finally, the total cost of each treatment episode was  
12 calculated for each patient by multiplying the minute cost for each resource with the total  
13 number of minutes spent on each activity and then summing across all resources. Time  
14 estimates (and thus costs) not related to psychologists (e.g. assessments by medical doctors  
15 and administrative tasks by nurses and secretaries outside of treatment) were assumed to be  
16 similar in both groups. In addition to calculating actual costs, costs were also estimated when  
17 discounted at annual rates of 3% and 5% respectively, and presented in €, year 2017 values.  
18  
19  
20  
21  
22  
23  
24  
25  
26  
27  
28  
29  
30  
31  
32  
33

#### 34 <Cost-minimisation analysis>

35  
36 Since the main outcome study have demonstrated equivalence in treatment efficacy, we chose  
37 to conduct a CMA where costs per course of treatment from a healthcare provider perspective  
38 were calculated and compared between treatment groups; if total costs were reduced by more  
39 efficient resource use, cost-minimisation may be achieved (23). In order to avoid biased  
40 estimation of uncertainty, we have used the statistical methods of cost-effectiveness to  
41 evaluate the joint distributions of costs and benefits.  
42  
43  
44  
45  
46  
47  
48  
49  
50

#### 51 <Sensitivity analysis>

52  
53 A probability sensitivity analysis was performed to estimate the uncertainty surrounding the  
54 cost-effectiveness ratios. Confidence ellipses at 50%, 75%, and 95% were calculated and  
55  
56  
57  
58  
59  
60

1  
2  
3 cost-effectiveness acceptability curves (CEACs) were constructed to represent the uncertainty  
4  
5 around the estimate (24) in accordance with recommended guidelines (25). Incremental net  
6  
7 benefit (INB) was used to interpret the CEAC, where the slope of the net monetary benefits  
8  
9 (NMB) curve represents the difference in effects between ICBT and CBGT.  
10

## 11 <Results>

### 12 <Outcomes>

13  
14  
15  
16  
17  
18 As previously reported (18) the between-group effect size on EQ5D was -0.18 (95% CI: -0.53  
19  
20 to 0.17), indicating equivalence in treatment effects. The within-group effect size was -0.36  
21  
22 (95% CI: -0.70 to -0.01) for ICBT and -0.25 (95% CI: -0.60 to 0.10) for CBGT. Treatment  
23  
24 adherence was similar across treatment conditions; out of possible 15 sessions and modules  
25  
26 respectively, mean number of attended sessions was 9.40 (SD = 4.87) in the CBGT group  
27  
28 and 9.33 (SD = 4.95) in the ICBT group. As previously reported, number of attendet  
29  
30 treatment sessions/completed modules was positively related to treatment outcome (26).  
31  
32  
33  
34  
35

### 36 <Resource use>

37  
38 An independent-samples t-test was conducted to compare psychologist time in ICBT and  
39  
40 CBGT treatments. There was a significantly lower use of psychologist time in ICBT (M =  
41  
42 189.60, SD = 53.77) compared to CBGT (M = 499.78, SD = 30.91), with a mean difference  
43  
44 of 310.16 (95% CI: 248.47 to 371.86) minutes;  $t(124) = 9.95, p < .001$ . Table 1 presents  
45  
46 average number of minutes consumed per resource category over a complete cycle of care.  
47  
48  
49  
50

51 INSERT TABLE 1 ABOUT HERE.  
52  
53  
54

### 55 <Costs and cost-minimisation>

56  
57  
58  
59  
60

1  
2  
3 Mean total healthcare costs are reported in Table 1. Taking into account the complete  
4  
5 treatment episode, total estimated cost for ICBT was 463 € (95% CI: 446 € to 480 €) per  
6  
7 patient compared with 806 € (95% CI: 730 € to 883 €) for CBGT. Table 1 also presents the  
8  
9 average costs for each resource involved in the complete care episode, where costs of hospital  
10  
11 space, supervision, IT and management has been allocated over each staff category. Estimated  
12  
13 capacity cost rates (cost per minute) were 1.21 €/min for coordinating nurses, 1.02 €/min for  
14  
15 medical secretaries, 1.24 €/min for psychologists, 1.40 €/min for resident physicians and 2.13  
16  
17 €/min for psychiatrists.  
18  
19

20  
21 The estimated cost-saving of ICBT relative to CBGT was 343 € (95% CI: 267 €  
22  
23 to 420 €). Fig. 1 illustrates confidence-ellipses around the point estimate; as the 95% and 75%  
24  
25 confidence ellipses occupy both the south-east (SE) and south-west (SW) quadrants, this  
26  
27 indicates that the ICBT treatment was equally effective but less costly relative to the CBGT  
28  
29 intervention; the entire density within the ellipses involves cost-savings. Table 2 presents  
30  
31 costs and mean differences when taking account of time, assuming 3% and 5% annual  
32  
33 discount rates; when costs were discounted at 3%, the mean difference was 305 € (95% CI:  
34  
35 237 € to 373 €) and 283 € (95% CI: 220 € to 345 €) at a 5% discount rate.  
36  
37

38 INSERT TABLE 2 ABOUT HERE  
39  
40  
41

42  
43 INSERT FIG. 1 ABOUT HERE  
44  
45

46  
47 The cost-effectiveness acceptability curve (CEAC) is presented in **Fig. 2**. The CEAC  
48  
49 indicates the probability that ICBT is cost-effective compared with CBGT for a given value of  
50  
51 the maximum willingness to pay (WTP) for a gained unit of health-related quality of life. As  
52  
53 can be seen, the probability for ICBT being cost-effective is high regardless of WTP.  
54  
55  
56  
57  
58  
59  
60

1  
2  
3 INSERT FIG. 2 ABOUT HERE  
4  
5  
6

7 A graphical representation of the net benefit is illustrated in Fig. 3. The uncertainty of the  
8 value of the intervention gets larger as the WTP for the clinical outcome increases; this is  
9 reflected in the increasing CI of the INB. The positive NMBs suggest that the intervention is  
10 cost-effective at four year follow-up assessment.  
11  
12  
13  
14  
15

16  
17  
18 INSERT FIG. 3 ABOUT HERE  
19  
20  
21

## 22 <Discussion>

### 23 < Principal findings >

24  
25  
26 The objective of this study was to assess whether ICBT is less costly relative to CBGT in the  
27 treatment of patients with SAD. While clinical treatment effects were equivalent, healthcare  
28 costs were lower in the ICBT group (463 €) compared with the CBGT group (806 €). This  
29 study thus showed that ICBT for SAD is clearly less costly compared to CBGT from a health  
30 care provider perspective. These results add to the previous body of research demonstrating  
31 that ICBT is associated with improved economic outcomes. (27) However, most health  
32 economic evaluations have mainly been performed from a societal perspective. By using a  
33 healthcare provider perspective, and a TDABC costing approach, this study may help to  
34 develop a greater understanding of the costs incurred by the resources used throughout the  
35 clinical care of patients and by their administrative processes.  
36  
37  
38  
39  
40  
41  
42  
43  
44  
45  
46  
47  
48  
49  
50

### 51 <Implications for policy and practice>

52 Evidence suggests that ICBT is equally effective as the more commonly provided face-to-face  
53 CBT, not only for SAD (15, 28) but for a wide range of mood and anxiety disorders (29),  
54  
55  
56  
57  
58  
59  
60

1  
2  
3 while requiring less healthcare resources. Therefore, ICBT may have a number of advantages  
4  
5 that would benefit both health care providers and patients. First, since ICBT requires  
6  
7 significantly less therapist time, each therapist is able to treat more patients simultaneously,  
8  
9 consequentially increasing treatment availability and shortening waiting lists. Another  
10  
11 advantage is that ICBT overcomes geographic barriers for patients and thus to provide access  
12  
13 to evidence based psychological treatment at more equal opportunities. Finally, accessing  
14  
15 therapy sessions online is practical and more economical for patients because it enables them  
16  
17 to work with the treatment at their own convenience, and not having to take time off work for  
18  
19 making visits to their healthcare provider. To further increase access to evidence based  
20  
21 psychological interventions for SAD, ICBT may be considered as an alternative to face-to-  
22  
23 face psychological therapies as an initial step within a stepped care approach. This should also  
24  
25 be considered for other evidence based ICBT applications such as in depression and panic  
26  
27 disorder.  
28  
29  
30

31  
32  
33  
34 *<Strengths and limitations>*

35  
36 The main strengths of the present study were the randomized controlled design, the direct  
37  
38 comparison of ICBT against face-to-face CBT, and the low attrition rates. However, the study  
39  
40 had some limitations.  
41

42  
43 First, the use of TDABC as a costing methodology in healthcare is relatively  
44  
45 new, particularly within mental health care; it has been more commonly used in industry. (30-  
46  
47 32) Therefore, its validity may be difficult to evaluate at this stage. Also, although CBT  
48  
49 treatment delivery may be similar across different healthcare providers, supporting  
50  
51 administrative processes and clinical practices might differ significantly. As a result, it may  
52  
53 be difficult to generalize time and cost estimates of the total healthcare episode to other  
54  
55 settings and healthcare providers.  
56  
57  
58  
59  
60

1  
2  
3 A second limitation relates to difficulties in arriving at accurate time estimates  
4 of resource use and activities performed. Since actual logging of time requires an electronic  
5 measurement system, only accurate timing of the amount of time each psychologist spent with  
6 each patient in ICBT could be recorded (thus providing measures of variability), whereas  
7 other clinical and administrative processes were based on estimated average standard times.  
8  
9

10  
11  
12  
13  
14 Third, parts of the time studies and estimations on resource use were carried out  
15 several years after the original RCT, i.e. when the treatment had been implemented as routine  
16 care. Although administrative routines and processes have remained more or less similar over  
17 the years, there may still be minor differences when compared to how the administrative  
18 processes were during the RCT. As a consequence, difficulties in retrieving exact cost data  
19 may add to the uncertainty around cost estimates.  
20  
21  
22  
23  
24  
25  
26

27  
28 Finally, we will comment on the choice of cost-minimisation analysis in the  
29 present study. Economic evaluations in healthcare compare treatment options or technologies  
30 in terms of clinical effects and costs, typically resulting in a cost-effectiveness ratio. The  
31 incremental cost-effectiveness ratio (ICER) summarises the cost-effectiveness of a treatment  
32 relative to an alternative by calculating the difference in costs between the two divided by the  
33 difference in effects (23). We have previously estimated an ICER from a societal perspective  
34 using the formula  $(C_{ICBT} - C_{CBGT}) / (E_{ICBT} - E_{CBGT})$ , where  $C_{ICBT}$  and  $E_{ICBT}$  represents the cost  
35 and effect in the ICBT group and where  $C_{CBGT}$  and  $E_{CBGT}$  represent the cost and effect in the  
36 CBGT group (16, 18). The difference between cost-effectiveness analysis (CEA) and cost-  
37 minimisation analysis (CMA) has been further discussed elsewhere (33); a full cost-  
38 effectiveness analysis is often a preferred method to assess differences in both costs and  
39 effects. However, in the context of a non-inferiority trial where treatments have been found to  
40 be equally effective, CMA may be an appropriate method to analyze cost differences (23),  
41 since the focus of interest is which treatment is less expensive. Since both treatments in this  
42  
43  
44  
45  
46  
47  
48  
49  
50  
51  
52  
53  
54  
55  
56  
57  
58  
59  
60

1  
2  
3 study were found to have equivalent efficacy, estimating an ICER may not be the optimal  
4  
5 approach as the ICER approaches infinity when effect difference is close to zero. However, if  
6  
7 ICBT can reduce resource use in treatment of SAD, it may lower healthcare costs. Therefore,  
8  
9 a cost-minimisation approach was considered more appropriate in this case.  
10

11  
12  
13  
14 <Conclusion>

15  
16 In treatment of SAD, ICBT is equally effective but is associated with more efficient staff  
17  
18 utilization and considerably lower costs compared with CBGT. From a health care provider  
19  
20 perspective, ICBT is an advantageous treatment option.  
21  
22  
23  
24  
25  
26  
27  
28  
29  
30  
31  
32  
33  
34  
35  
36  
37  
38  
39  
40  
41  
42  
43  
44  
45  
46  
47  
48  
49  
50  
51  
52  
53  
54  
55  
56  
57  
58  
59  
60

1  
2  
3  
4  
5 **Contributions of authors:** SAE designed the study, performed the analyses, collected and  
6  
7 interpreted the data and drafted the paper. EH designed the study, developed the SAD  
8  
9 treatment, performed the analyses, and drafted the paper. NL and BL designed the study,  
10  
11 interpreted the data, and drafted the paper.  
12  
13

14  
15  
16 **Samir El Alaoui**, PhD, Karolinska Institutet, Dept of Clin. Neuroscience, Stockholm,  
17  
18 Sweden, **Erik Hedman**, PhD, Karolinska Institutet, Dept of Clin. Neuroscience, Stockholm,  
19  
20 Brjánn Ljótsson, PhD, Karolinska Institutet, Dept of Clin. Neuroscience, Stockholm, Sweden  
21  
22 & **Nils Lindfors**, PhD, Karolinska Institutet, Dept of Clin. Neuroscience, Stockholm,  
23  
24 Sweden  
25  
26  
27  
28

29 **Correspondence:** Samir El Alaoui, PhD, Department of Clinical Neuroscience (CNS), M58,  
30  
31 Karolinska Universitetssjukhuset, Huddinge 141 86 Stockholm, Sweden.  
32  
33 (samir.el.alaoui@ki.se).  
34  
35  
36  
37

38 **Funding:** This research was founded by Karolinska Institutet and Stockholm County Council,  
39  
40 none of which had any role in the design, execution or publication of the study.  
41  
42  
43  
44

45 **Competing interests:** None declared.  
46  
47  
48  
49

50 **Data sharing statement:** No additional data are available.  
51  
52  
53  
54  
55  
56  
57  
58  
59  
60



1  
2  
3 **Fig. 1.** *Mean differences in costs and gained health-related quality of life.*  
4  
5  
6

7 Note. Each confidence-ellipse represents regions with a 50%, 75% or 95% certainty around  
8 the mean difference in cost and effect. Abbreviations: ICBT, internet-based cognitive  
9 behaviour therapy.  
10  
11  
12

13  
14  
15 **Fig. 2.** *Cost-effectiveness acceptability curve at 4-year follow.*  
16  
17

18 Note. The cost-effectiveness acceptability curve shows the probability that ICBT is cost-  
19 effective with changes in the amount that society is willing to pay for a unit increase in health  
20 related quality of life, considering healthcare costs.  
21  
22  
23  
24

25  
26  
27 **Fig. 3.** *Net monetary benefit curves and 95% confidence intervals at 4-year follow-up.*  
28  
29  
30  
31  
32  
33  
34  
35  
36  
37  
38  
39  
40  
41  
42  
43  
44  
45  
46  
47  
48  
49  
50  
51  
52  
53  
54  
55  
56  
57  
58  
59  
60

## Tables

**Table 1.** Estimation of a patient's cost over a complete cycle of care for treating social anxiety disorder with ICBT or with CBGT

|                                                | Coordinating nurse |              | Psychiatrist    |              | Resident physician |              | Psychologist    |              | Medical secretary |              | Total           |              |
|------------------------------------------------|--------------------|--------------|-----------------|--------------|--------------------|--------------|-----------------|--------------|-------------------|--------------|-----------------|--------------|
|                                                | Average minutes    | Average cost | Average minutes | Average cost | Average minutes    | Average cost | Average minutes | Average cost | Average minutes   | Average cost | Average minutes | Average cost |
| <b>ICBT</b>                                    |                    |              |                 |              |                    |              |                 |              |                   |              |                 |              |
| Registration and Verification                  | 11                 | 13€          | 0               | 0€           | 0                  | 0€           | 0               | 0€           | 0                 | 0€           | 11              | 13€          |
| Diagnostic assessment                          | 0                  | 0€           | 20              | 43€          | 80                 | 112€         | 0               | 0€           | 0                 | 0€           | 100             | 154€         |
| Supervision meeting / discussion               | 0                  | 0€           | 3               | 6€           | 3                  | 4€           | 1               | 1€           | 0                 | 0€           | 7               | 11€          |
| Supplementary psychological assessment         | 0                  | 0€           | 0               | 0€           | 0                  | 0€           | 5               | 7€           | 0                 | 0€           | 5               | 7€           |
| Administrating treatment activation            | 0                  | 0€           | 0               | 0€           | 0                  | 0€           | 0               | 0€           | 41                | 41€          | 41              | 41€          |
| ICBT intervention (online)                     | 0                  | 0€           | 0               | 0€           | 0                  | 0€           | 82              | 102€         | 0                 | 0€           | 82              | 102€         |
| ICBT intervention (offline)                    | 0                  | 0€           | 0               | 0€           | 0                  | 0€           | 77              | 95€          | 0                 | 0€           | 77              | 95€          |
| Administrative preparation for follow-up visit | 3                  | 3€           | 0               | 0€           | 0                  | 0€           | 0               | 0€           | 0                 | 0€           | 3               | 3€           |
| Post-treatment clinical visit                  | 0                  | 0€           | 0               | 0€           | 0                  | 0€           | 24              | 30€          | 0                 | 0€           | 24              | 30€          |
| Discharge                                      | 0                  | 0€           | 0               | 0€           | 0                  | 0€           | 0               | 0€           | 5                 | 5€           | 5               | 5€           |
| <b>Total</b>                                   | <b>14</b>          | <b>17€</b>   | <b>23</b>       | <b>49€</b>   | <b>83</b>          | <b>116€</b>  | <b>190</b>      | <b>235€</b>  | <b>46</b>         | <b>46€</b>   | <b>355</b>      | <b>463€</b>  |
| <b>CBGT</b>                                    |                    |              |                 |              |                    |              |                 |              |                   |              |                 |              |
| Registration and Verification                  | 11                 | 13€          | 0               | 0€           | 0                  | 0€           | 0               | 0€           | 0                 | 0€           | 11              | 13€          |
| Diagnostic assessment                          | 0                  | 0€           | 20              | 43€          | 80                 | 112€         | 0               | 0€           | 0                 | 0€           | 100             | 154€         |
| Supervision meeting / discussion               | 0                  | 0€           | 3               | 6€           | 3                  | 4€           | 1               | 1€           | 0                 | 0€           | 7               | 11€          |
| Supplementary psychological assessment         | 0                  | 0€           | 0               | 0€           | 0                  | 0€           | 5               | 7€           | 0                 | 0€           | 5               | 7€           |

|                                                |           |            |           |            |           |             |            |             |          |           |            |             |
|------------------------------------------------|-----------|------------|-----------|------------|-----------|-------------|------------|-------------|----------|-----------|------------|-------------|
| CBGT intervention                              | 0         | 0€         | 0         | 0€         | 0         | 0€          | 470        | 582€        | 0        | 0€        | 470        | 582€        |
| Administrative preparation for follow-up visit | 3         | 3€         | 0         | 0€         | 0         | 0€          | 0          | 0€          | 0        | 0€        | 3          | 3€          |
| Post-treatment clinical visit                  | 0         | 0€         | 0         | 0€         | 0         | 0€          | 24         | 30€         | 0        | 0€        | 24         | 30€         |
| Discharge                                      | 0         | 0€         | 0         | 0€         | 0         | 0€          | 0          | 0€          | 5        | 5€        | 5          | 5€          |
| <b>Total</b>                                   | <b>14</b> | <b>17€</b> | <b>23</b> | <b>49€</b> | <b>83</b> | <b>116€</b> | <b>500</b> | <b>619€</b> | <b>5</b> | <b>5€</b> | <b>625</b> | <b>806€</b> |

## HEALTH ECONOMIC EVALUATION OF ICBT FOR SAD

**Table 2.** *Estimation of actual and discounted costs of care for treating social anxiety disorder with ICBT or with CBGT*

|                                        | Group | N  | Mean cost, € | SD  | Mean difference, € | 95% Confidence Interval of the Difference |     |
|----------------------------------------|-------|----|--------------|-----|--------------------|-------------------------------------------|-----|
| Total costs, actual                    | CBGT  | 62 | 806          | 302 |                    |                                           |     |
|                                        | ICBT  | 64 | 463          | 67  | 343                | 267                                       | 420 |
| Total costs, discounted at 3% per year | CBGT  | 62 | 717          | 268 |                    |                                           |     |
|                                        | ICBT  | 64 | 411          | 59  | 305                | 237                                       | 373 |
| Total costs, discounted at 5% per year | CBGT  | 62 | 663          | 248 |                    |                                           |     |
|                                        | ICBT  | 64 | 381          | 55  | 283                | 220                                       | 345 |

## HEALTH ECONOMIC EVALUATION OF ICBT FOR SAD

## &lt; References &gt;

1. Bebbington P, Brugha T, Coid J, Crawford M, Deverill C, D'Souza J, et al. Adult Psychiatric Morbidity in England, 2007: Results of a Household Survey. Social Care Statistics. 2009.
2. The economic and social costs of mental health problems in 2009/10. Centre for Mental Health, 2010.
3. Kessler RC, Chiu WT, Demler O, Merikangas KR, Walters EE. Prevalence, severity, and comorbidity of 12-month DSM-IV disorders in the National Comorbidity Survey Replication. Arch Gen Psychiatry. 2005; 62(6): 617-27.
4. Ruscio AM, Brown TA, Chiu WT, Sareen J, Stein MB, Kessler RC. Social fears and social phobia in the USA: results from the National Comorbidity Survey Replication. Psychol Med. 2008; 38(1): 15-28.
5. Grant BF, Hasin DS, Blanco C, Stinson FS, Chou SP, Goldstein RB, et al. The epidemiology of social anxiety disorder in the United States: results from the National Epidemiologic Survey on Alcohol and Related Conditions. The Journal of clinical psychiatry. 2005; 66(11): 1351-61.
6. Kessler RC, Chiu WT, Demler O, Walters EE. Prevalence, Severity, and Comorbidity of 12-Month DSM-IV Disorders in the National Comorbidity Survey Replication. Arch Gen Psychiatry. 2005; 62(6): 617-27.
7. Kessler RC, Berglund P, Demler O, Jin R, Merikangas KR, Walters EE. Lifetime prevalence and age-of-onset distributions of DSM-IV disorders in the National Comorbidity Survey Replication. Arch Gen Psychiatry. 2005; 62(6): 593-602.
8. Wittchen HU, Fehm L. Epidemiology and natural course of social fears and social phobia. Acta Psychiatr Scand Suppl. 2003; (417): 4-18.

## HEALTH ECONOMIC EVALUATION OF ICBT FOR SAD

- 1  
2  
3 9. Yonkers KA, Dyck IR, Keller MB. An eight-year longitudinal comparison of  
4 clinical course and characteristics of social phobia among men and women. *Psychiatr Serv.*  
5 2001; 52(5): 637-43.  
6
- 7  
8  
9 10. Health NCCfM. Social anxiety disorder: recognition, assessment and treatment.  
10 In: National Clinical Guideline Number 159: 2013.  
11
- 12  
13 11. Heimberg RG, Dodge CS, Hope DA, Kennedy CR, Zollo LJ, Becker RE.  
14 Cognitive behavioral group treatment for social phobia: Comparison with a credible placebo  
15 control. *Cognitive Ther Res.* 1990; 14(1): 1-23.  
16
- 17  
18 12. Blanco C, Heimberg RG, Schneier FR, Fresco DM, Chen H, Turk CL, et al. A  
19 Placebo-Controlled Trial of Phenzelzine, Cognitive Behavioral Group Therapy, and Their  
20 Combination for Social Anxiety Disorder. *Arch Gen Psychiatry.* 2010; 67(3): 286-95.  
21
- 22  
23 13. Cavanagh K. Geographic Inequity in the Availability of Cognitive Behavioural  
24 Therapy in England and Wales: A 10-Year Update. *Behav Cogn Psychother.* 2013: 1-5.  
25
- 26  
27 14. Hedman E, Ljótsson B, Lindefors N. Cognitive behavior therapy via the  
28 Internet: a systematic review of applications, clinical efficacy and cost-effectiveness. *Expert*  
29 *Rev Pharmacoecon Outcomes Res.* 2012; 12(6): 745-64.  
30
- 31  
32 15. Hedman E, Andersson G, Ljotsson B, Andersson E, Ruck C, Mortberg E, et al.  
33 Internet-based cognitive behavior therapy vs. cognitive behavioral group therapy for social  
34 anxiety disorder: a randomized controlled non-inferiority trial. *PloS one.* 2011; 6(3): e18001.  
35
- 36  
37 16. Hedman E, Andersson E, Ljotsson B, Andersson G, Ruck C, Lindefors N. Cost-  
38 effectiveness of Internet-based cognitive behavior therapy vs. cognitive behavioral group  
39 therapy for social anxiety disorder: results from a randomized controlled trial. *Behaviour*  
40 *research and therapy.* 2011; 49(11): 729-36.  
41  
42  
43  
44  
45  
46  
47  
48  
49  
50  
51  
52  
53  
54  
55  
56  
57  
58  
59  
60

## HEALTH ECONOMIC EVALUATION OF ICBT FOR SAD

- 1  
2  
3  
4  
5  
6  
7  
8  
9  
10  
11  
12  
13  
14  
15  
16  
17  
18  
19  
20  
21  
22  
23  
24  
25  
26  
27  
28  
29  
30  
31  
32  
33  
34  
35  
36  
37  
38  
39  
40  
41  
42  
43  
44  
45  
46  
47  
48  
49  
50  
51  
52  
53  
54  
55  
56  
57  
58  
59  
60
17. Titov N, Andrews G, Johnston L, Schwencke G, Choi I. Shyness programme: longer term benefits, cost-effectiveness, and acceptability. *The Australian and New Zealand journal of psychiatry*. 2009; 43(1): 36-44.
18. Hedman E, El Alaoui S, Lindefors N, Andersson E, Ruck C, Ghaderi A, et al. Clinical effectiveness and cost-effectiveness of Internet- vs. group-based cognitive behavior therapy for social anxiety disorder: 4-Year follow-up of a randomized trial. *Behaviour research and therapy*. 2014; 59C: 20-9.
19. Clark DM, Wells A. A cognitive model of social phobia. In: *Social phobia: Diagnosis, assessment and treatment*. Guilford press, 1995.
20. Carlbring P, Gunnarsdottir M, Hedensjo L, Andersson G, Ekselius L, Furmark T. Treatment of social phobia: randomised trial of internet-delivered cognitive-behavioural therapy with telephone support. *The British journal of psychiatry : the journal of mental science*. 2007; 190: 123-8.
21. Tillfors M, Carlbring P, Furmark T, Lewenhaupt S, Spak M, Eriksson A, et al. Treating university students with social phobia and public speaking fears: Internet delivered self-help with or without live group exposure sessions. *Depression and anxiety*. 2008; 25(8): 708-17.
22. Kaplan RS, Anderson SR. Time-driven activity-based costing. *Harvard Bus Rev*. 2004; 82(11): 131-+.
23. Drummond MF. *Methods for the economic evaluation of health care programmes*. Oxford University Press, 2005.
24. Fenwick E, O'Brien BJ, Briggs A. Cost-effectiveness acceptability curves--facts, fallacies and frequently asked questions. *Health Econ*. 2004; 13(5): 405-15.

## HEALTH ECONOMIC EVALUATION OF ICBT FOR SAD

- 1  
2  
3 25. Glick HA, Briggs AH, Polsky D. Quantifying stochastic uncertainty and  
4 presenting results of cost-effectiveness analyses. *Expert review of pharmacoeconomics &*  
5  
6  
7 outcomes research. 2001; 1(1): 25-36.  
8
- 9 26. Hedman E, Andersson E, Ljotsson B, Andersson G, Andersson E, Schalling M,  
10 et al. Clinical and genetic outcome determinants of internet- and group-based cognitive  
11 behavior therapy for social anxiety disorder. *Acta psychiatrica Scandinavica*. 2012; 126(2):  
12  
13 126-36.  
14
- 15 27. Hedman E, Ljotsson B, Lindefors N. Cognitive behavior therapy via the  
16  
17 Internet: a systematic review of applications, clinical efficacy and cost-effectiveness. *Expert*  
18  
19 review of pharmacoeconomics & outcomes research. 2012; 12(6): 745-64.  
20
- 21 28. Andrews G, Davies M, Titov N. Effectiveness randomized controlled trial of  
22  
23 face to face versus Internet cognitive behaviour therapy for social phobia. *The Australian and*  
24  
25  
26  
27  
28  
29  
30  
31  
32  
33  
34  
35  
36  
37  
38  
39  
40  
41  
42  
43  
44  
45  
46  
47  
48  
49  
50  
51  
52  
53  
54  
55  
56  
57  
58  
59  
60
29. Andersson G, Cuijpers P, Carlbring P, Riper H, Hedman E. Guided Internet-  
based vs. face-to-face cognitive behavior therapy for psychiatric and somatic disorders: a  
systematic review and meta-analysis. *World psychiatry : official journal of the World*  
*Psychiatric Association*. 2014; 13(3): 288-95.
30. Eldenburg L, Krishan R. Management accounting and control in health care: an  
economic perspective. In: *Handbook of management accounting research* (eds C Chapman, A  
Hopwood, M Shields): 859–83. Elsevier, 2007.
31. Kaplan RS, Porter ME. How to Solve The Cost Crisis In Health Care. *Harvard*  
*Bus Rev*. 2011; 89(9): 46-+.
32. McLaughlin N, Burke MA, Setlur NP, Niedzwiecki DR, Kaplan AL, Saigal C,  
et al. Time-driven activity-based costing: a driver for provider engagement in costing  
activities and redesign initiatives. *Neurosurg Focus*. 2014; 37(5).



## HEALTH ECONOMIC EVALUATION OF ICBT FOR SAD

- 1  
2  
3 33. Dakin H, Wordsworth S. Cost-Minimisation Analysis Versus Cost-  
4 Effectiveness Analysis, Revisited. Health Econ. 2013; 22(1): 22-34.  
5  
6  
7  
8  
9  
10  
11  
12  
13  
14  
15  
16  
17  
18  
19  
20  
21  
22  
23  
24  
25  
26  
27  
28  
29  
30  
31  
32  
33  
34  
35  
36  
37  
38  
39  
40  
41  
42  
43  
44  
45  
46  
47  
48  
49  
50  
51  
52  
53  
54  
55  
56  
57  
58  
59  
60

For peer review only

1  
2  
3  
4  
5  
6  
7  
8  
9  
10  
11  
12  
13  
14  
15  
16  
17  
18  
19  
20  
21  
22  
23  
24  
25  
26  
27  
28  
29  
30  
31  
32  
33  
34  
35  
36  
37  
38  
39  
40  
41  
42  
43  
44  
45  
46  
47  
48  
49  
50  
51  
52  
53  
54  
55  
56  
57  
58  
59  
60

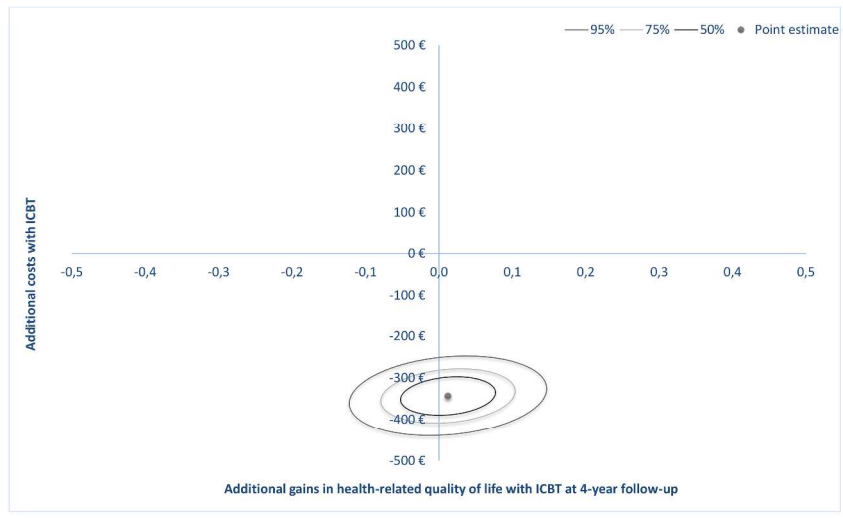

Fig. 1. Mean differences in costs and gained health-related quality of life.

297x210mm (300 x 300 DPI)

ew only

1  
2  
3  
4  
5  
6  
7  
8  
9  
10  
11  
12  
13  
14  
15  
16  
17  
18  
19  
20  
21  
22  
23  
24  
25  
26  
27  
28  
29  
30  
31  
32  
33  
34  
35  
36  
37  
38  
39  
40  
41  
42  
43  
44  
45  
46  
47  
48  
49  
50  
51  
52  
53  
54  
55  
56  
57  
58  
59  
60

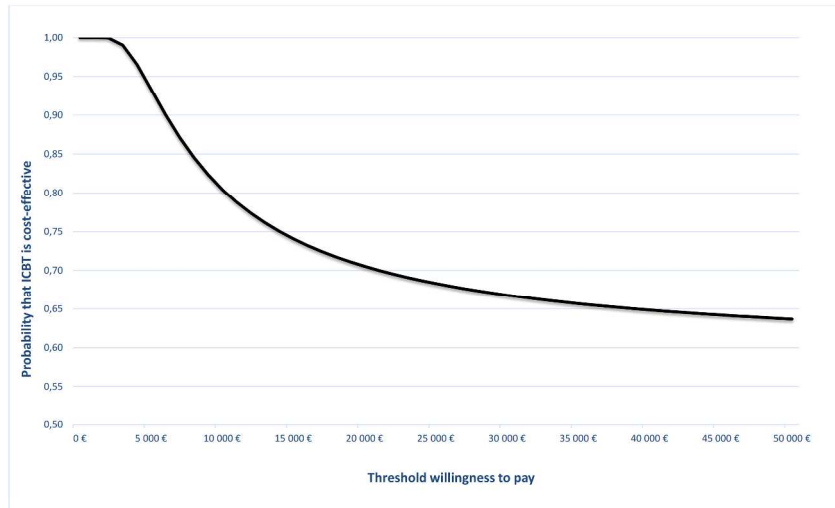

Fig. 2. Cost-effectiveness acceptability curve at 4-year follow.

297x210mm (300 x 300 DPI)

Review only

1  
2  
3  
4  
5  
6  
7  
8  
9  
10  
11  
12  
13  
14  
15  
16  
17  
18  
19  
20  
21  
22  
23  
24  
25  
26  
27  
28  
29  
30  
31  
32  
33  
34  
35  
36  
37  
38  
39  
40  
41  
42  
43  
44  
45  
46  
47  
48  
49  
50  
51  
52  
53  
54  
55  
56  
57  
58  
59  
60

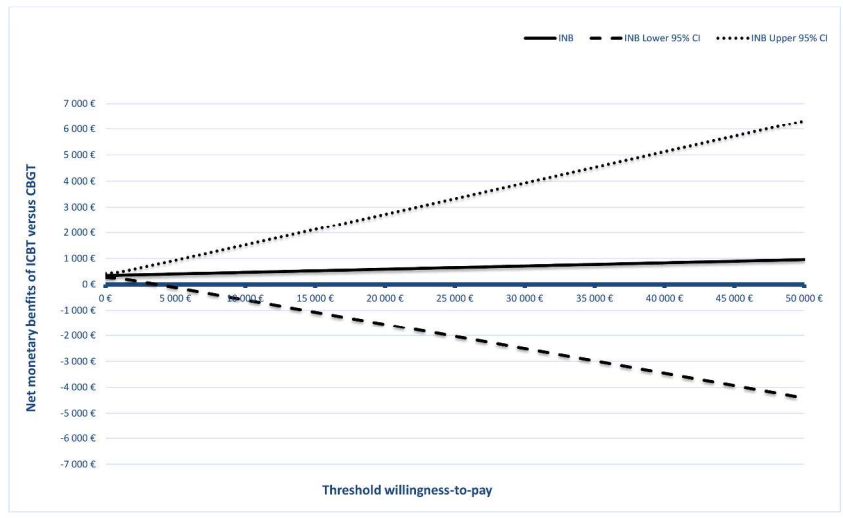

Fig. 3. Net monetary benefit curves and 95% confidence intervals at 4-year follow-up

297x210mm (300 x 300 DPI)

Review only

| Control Group (CBGT) |        |         | Intervention Group (ICBT) |        |       |
|----------------------|--------|---------|---------------------------|--------|-------|
| Patient              | Effect | Cost    | Patient                   | Effect | Cost  |
| 1                    | ,12    | 1 091 € | 1                         | ,56    | 546 € |
| 2                    | -,54   | 223 €   | 2                         | ,13    | 389 € |
| 3                    | -,89   | 595 €   | 3                         | -,04   | 453 € |
| 4                    | ,19    | 1 153 € | 4                         | -,59   | 482 € |
| 5                    | ,15    | 1 153 € | 5                         | ,15    | 495 € |
| 6                    | ,00    | 1 091 € | 6                         | -,54   | 364 € |
| 7                    | -,04   | 1 153 € | 7                         | -,43   | 503 € |
| 8                    | ,40    | 905 €   | 8                         | ,15    | 457 € |
| 9                    | ,08    | 347 €   | 9                         | ,08    | 403 € |
| 10                   | ,15    | 409 €   | 10                        | ,04    | 476 € |
| 11                   | ,08    | 843 €   | 11                        | ,56    | 557 € |
| 12                   | ,15    | 223 €   | 12                        | ,00    | 519 € |
| 13                   | ,54    | 781 €   | 13                        | ,15    | 473 € |
| 14                   | ,03    | 905 €   | 14                        | ,00    | 447 € |
| 15                   | ,31    | 781 €   | 15                        | ,08    | 493 € |
| 16                   | ,08    | 1 029 € | 16                        | ,15    | 397 € |
| 17                   | ,19    | 1 091 € | 17                        | ,28    | 447 € |
| 18                   | ,20    | 1 091 € | 18                        | ,28    | 399 € |
| 19                   | -,47   | 347 €   | 19                        | ,51    | 437 € |
| 20                   | ,43    | 595 €   | 20                        | ,28    | 379 € |
| 21                   | ,19    | 1 029 € | 21                        | ,28    | 499 € |
| 22                   | ,08    | 967 €   | 22                        | ,31    | 483 € |
| 23                   | ,05    | 1 091 € | 23                        | ,28    | 406 € |
| 24                   | -,86   | 595 €   | 24                        | ,08    | 575 € |
| 25                   | ,20    | 1 091 € | 25                        | ,28    | 530 € |
| 26                   | ,20    | 223 €   | 26                        | ,43    | 508 € |
| 27                   | ,15    | 1 091 € | 27                        | -,43   | 469 € |
| 28                   | ,13    | 719 €   | 28                        | ,00    | 490 € |
| 29                   | ,77    | 285 €   | 29                        | ,08    | 621 € |
| 30                   | ,20    | 595 €   | 30                        | ,08    | 385 € |
| 31                   | ,12    | 1 153 € | 31                        | -,08   | 394 € |
| 32                   | ,08    | 223 €   | 32                        | ,00    | 416 € |
| 33                   | ,40    | 1 091 € | 33                        | -,27   | 384 € |
| 34                   | ,51    | 967 €   | 34                        | ,08    | 477 € |
| 35                   | -,43   | 781 €   | 35                        | ,15    | 410 € |
| 36                   | ,28    | 905 €   | 36                        | ,03    | 431 € |
| 37                   | ,00    | 285 €   | 37                        | ,08    | 507 € |
| 38                   | ,15    | 1 091 € | 38                        | ,00    | 522 € |
| 39                   | -,82   | 223 €   | 39                        | ,28    | 502 € |
| 40                   | ,15    | 657 €   | 40                        | ,12    | 468 € |
| 41                   | ,08    | 595 €   | 41                        | -,07   | 372 € |
| 42                   | ,24    | 1 091 € | 42                        | ,15    | 385 € |
| 43                   | ,43    | 657 €   | 43                        | -,01   | 534 € |
| 44                   | ,20    | 967 €   | 44                        | -,54   | 377 € |
| 45                   | ,00    | 967 €   | 45                        | ,28    | 429 € |
| 46                   | -,10   | 1 153 € | 46                        | ,19    | 428 € |

|    |    |      |         |    |      |       |
|----|----|------|---------|----|------|-------|
| 1  |    |      |         |    |      |       |
| 2  | 47 | ,20  | 1 029 € | 47 | ,00  | 678 € |
| 3  | 48 | -,07 | 905 €   | 48 | ,15  | 497 € |
| 4  | 49 | ,43  | 1 091 € | 49 | ,08  | 449 € |
| 5  | 50 | ,15  | 409 €   | 50 | -,48 | 371 € |
| 6  | 51 | -,41 | 471 €   | 51 | ,03  | 468 € |
| 7  | 52 | ,08  | 657 €   | 52 | ,08  | 659 € |
| 8  | 53 | ,08  | 1 153 € | 53 | ,15  | 473 € |
| 9  | 54 | ,15  | 967 €   | 54 | -,01 | 481 € |
| 10 | 55 | -,82 | 1 029 € | 55 | ,63  | 455 € |
| 11 | 56 | ,15  | 1 029 € | 56 | ,19  | 404 € |
| 12 | 57 | ,40  | 533 €   | 57 | ,20  | 407 € |
| 13 | 58 | ,08  | 843 €   | 58 | ,27  | 420 € |
| 14 | 59 | ,08  | 1 029 € | 59 | ,28  | 480 € |
| 15 | 60 | -,52 | 843 €   | 60 | -,42 | 522 € |
| 16 | 61 | ,19  | 843 €   | 61 | -,50 | 453 € |
| 17 | 62 | ,20  | 843 €   | 62 | ,63  | 436 € |
| 18 |    |      |         | 63 | -,07 | 400 € |
| 19 |    |      |         | 64 | ,12  | 463 € |
| 20 |    |      |         |    |      |       |
| 21 |    |      |         |    |      |       |
| 22 |    |      |         |    |      |       |
| 23 |    |      |         |    |      |       |
| 24 |    |      |         |    |      |       |
| 25 |    | Mean | Mean    |    | Mean | Mean  |
| 26 |    | ,06  | 806 €   |    | ,08  | 463 € |
| 27 |    |      |         |    |      |       |
| 28 |    |      |         |    |      |       |
| 29 |    |      |         |    |      |       |
| 30 |    |      |         |    |      |       |
| 31 |    |      |         |    |      |       |
| 32 |    |      |         |    |      |       |
| 33 |    |      |         |    |      |       |
| 34 |    |      |         |    |      |       |
| 35 |    |      |         |    |      |       |
| 36 |    |      |         |    |      |       |
| 37 |    |      |         |    |      |       |
| 38 |    |      |         |    |      |       |
| 39 |    |      |         |    |      |       |
| 40 |    |      |         |    |      |       |
| 41 |    |      |         |    |      |       |
| 42 |    |      |         |    |      |       |
| 43 |    |      |         |    |      |       |
| 44 |    |      |         |    |      |       |
| 45 |    |      |         |    |      |       |
| 46 |    |      |         |    |      |       |
| 47 |    |      |         |    |      |       |
| 48 |    |      |         |    |      |       |
| 49 |    |      |         |    |      |       |
| 50 |    |      |         |    |      |       |
| 51 |    |      |         |    |      |       |
| 52 |    |      |         |    |      |       |
| 53 |    |      |         |    |      |       |
| 54 |    |      |         |    |      |       |
| 55 |    |      |         |    |      |       |
| 56 |    |      |         |    |      |       |
| 57 |    |      |         |    |      |       |
| 58 |    |      |         |    |      |       |
| 59 |    |      |         |    |      |       |
| 60 |    |      |         |    |      |       |

## CHEERS checklist—Items to include when reporting economic evaluations of health interventions

| Section/item                                           | Item No | Recommendation                                                                                                                                                                                                                                                                                                               | Reported on page No/<br>line No   |
|--------------------------------------------------------|---------|------------------------------------------------------------------------------------------------------------------------------------------------------------------------------------------------------------------------------------------------------------------------------------------------------------------------------|-----------------------------------|
| <b>Title and abstract</b>                              |         |                                                                                                                                                                                                                                                                                                                              |                                   |
| Title                                                  | 1       | Identify the study as an economic evaluation or use more specific terms such as “cost-effectiveness analysis”, and describe the interventions compared.                                                                                                                                                                      | page 1, line 2                    |
| Abstract                                               | 2       | Provide a structured summary of objectives, perspective, setting, methods (including study design and inputs), results (including base case and uncertainty analyses), and conclusions.                                                                                                                                      | page 2, line 1 to 24              |
| <b>Introduction</b>                                    |         |                                                                                                                                                                                                                                                                                                                              |                                   |
| Background and objectives                              | 3       | Provide an explicit statement of the broader context for the study.                                                                                                                                                                                                                                                          | page 3, line 7 to page 4, line 18 |
|                                                        |         | Present the study question and its relevance for health policy or practice decisions.                                                                                                                                                                                                                                        | page 4, line 9 to 18              |
| <b>Methods</b>                                         |         |                                                                                                                                                                                                                                                                                                                              |                                   |
| Target population and subgroups                        | 4       | Describe characteristics of the base case population and subgroups analysed, including why they were chosen.                                                                                                                                                                                                                 | page 4, line 20 and continued.    |
| Setting and location                                   | 5       | State relevant aspects of the system(s) in which the decision(s) need(s) to be made.                                                                                                                                                                                                                                         | page 4, line 20 and continued.    |
| Study perspective                                      | 6       | Describe the perspective of the study and relate this to the costs being evaluated.                                                                                                                                                                                                                                          | page 6, line 21 and continued.    |
| Comparators                                            | 7       | Describe the interventions or strategies being compared and state why they were chosen.                                                                                                                                                                                                                                      | page 4, line 20 and continued     |
| Time horizon                                           | 8       | State the time horizon(s) over which costs and consequences are being evaluated and say why appropriate.                                                                                                                                                                                                                     | page 5, line 1                    |
| Discount rate                                          | 9       | Report the choice of discount rate(s) used for costs and outcomes and say why appropriate.                                                                                                                                                                                                                                   | page 7, line 11                   |
| Choice of health outcomes                              | 10      | Describe what outcomes were used as the measure(s) of benefit in the evaluation and their relevance for the type of analysis performed.                                                                                                                                                                                      | page 6, line 9                    |
| Measurement of effectiveness                           | 11a     | <i>Single study-based estimates</i> : Describe fully the design features of the single effectiveness study and why the single study was a sufficient source of clinical effectiveness data.                                                                                                                                  | page 7, line 24                   |
|                                                        | 11b     | <i>Synthesis-based estimates</i> : Describe fully the methods used for identification of included studies and synthesis of clinical effectiveness data.                                                                                                                                                                      |                                   |
| Measurement and valuation of preference based outcomes | 12      | If applicable, describe the population and methods used to elicit preferences for outcomes.                                                                                                                                                                                                                                  | not applicable                    |
| Estimating resources and costs                         | 13a     | <i>Single study-based economic evaluation</i> : Describe approaches used to estimate resource use associated with the alternative interventions. Describe primary or secondary research methods for valuing each resource item in terms of its unit cost. Describe any adjustments made to approximate to opportunity costs. |                                   |

| Section/item                                                         | Item No | Recommendation                                                                                                                                                                                                                                                                                                                                        | Reported on page No/<br>line No       |
|----------------------------------------------------------------------|---------|-------------------------------------------------------------------------------------------------------------------------------------------------------------------------------------------------------------------------------------------------------------------------------------------------------------------------------------------------------|---------------------------------------|
|                                                                      | 13b     | <i>Model-based economic evaluation:</i> Describe approaches and data sources used to estimate resource use associated with model health states. Describe primary or secondary research methods for valuing each resource item in terms of its unit cost. Describe any adjustments made to approximate to opportunity costs.                           | not applicable                        |
| Currency, price date, and conversion                                 | 14      | Report the dates of the estimated resource quantities and unit costs. Describe methods for adjusting estimated unit costs to the year of reported costs if necessary. Describe methods for converting costs into a common currency base and the exchange rate.                                                                                        | page 7, line 12                       |
| Choice of model                                                      | 15      | Describe and give reasons for the specific type of decision-analytical model used. Providing a figure to show model structure is strongly recommended.                                                                                                                                                                                                | page 7, line 14                       |
| Assumptions                                                          | 16      | Describe all structural or other assumptions underpinning the decision-analytical model.                                                                                                                                                                                                                                                              |                                       |
| Analytical methods                                                   | 17      | Describe all analytical methods supporting the evaluation. This could include methods for dealing with skewed, missing, or censored data; extrapolation methods; methods for pooling data; approaches to validate or make adjustments (such as half cycle corrections) to a model; and methods for handling population heterogeneity and uncertainty. | page 7, line 19                       |
| <b>Results</b>                                                       |         |                                                                                                                                                                                                                                                                                                                                                       |                                       |
| Study parameters                                                     | 18      | Report the values, ranges, references, and, if used, probability distributions for all parameters. Report reasons or sources for distributions used to represent uncertainty where appropriate. Providing a table to show the input values is strongly recommended.                                                                                   | page 8, lines 11 to 24                |
| Incremental costs and outcomes                                       | 19      | For each intervention, report mean values for the main categories of estimated costs and outcomes of interest, as well as mean differences between the comparator groups. If applicable, report incremental cost-effectiveness ratios.                                                                                                                | figure 1;<br>page 8, lines 11 to 24   |
| Characterising uncertainty                                           | 20a     | <i>Single study-based economic evaluation:</i> Describe the effects of sampling uncertainty for the estimated incremental cost and incremental effectiveness parameters, together with the impact of methodological assumptions (such as discount rate, study perspective).                                                                           | figure 1                              |
|                                                                      | 20b     | <i>Model-based economic evaluation:</i> Describe the effects on the results of uncertainty for all input parameters, and uncertainty related to the structure of the model and assumptions.                                                                                                                                                           | not applicable                        |
| Characterising heterogeneity                                         | 21      | If applicable, report differences in costs, outcomes, or cost-effectiveness that can be explained by variations between subgroups of patients with different baseline characteristics or other observed variability in effects that are not reducible by more information.                                                                            | not applicable                        |
| <b>Discussion</b>                                                    |         |                                                                                                                                                                                                                                                                                                                                                       |                                       |
| Study findings, limitations, generalisability, and current knowledge | 22      | Summarise key study findings and describe how they support the conclusions reached. Discuss limitations and the generalisability of the findings and how the findings fit with current knowledge.                                                                                                                                                     | page 9, line 3 to<br>page 11, line 21 |



| Section/item          | Item No | Recommendation                                                                                                                                                                                                                                    | Reported on page No/<br>line No                |
|-----------------------|---------|---------------------------------------------------------------------------------------------------------------------------------------------------------------------------------------------------------------------------------------------------|------------------------------------------------|
| <b>Other</b>          |         |                                                                                                                                                                                                                                                   |                                                |
| Source of funding     | 23      | Describe how the study was funded and the role of the funder in the identification, design, conduct, and reporting of the analysis. Describe other non-monetary sources of support.                                                               | page 12, line 16                               |
| Conflicts of interest | 24      | Describe any potential for conflict of interest of study contributors in accordance with journal policy. In the absence of a journal policy, we recommend authors comply with International Committee of Medical Journal Editors recommendations. | Information provided via the submission system |

For consistency, the CHEERS statement checklist format is based on the format of the CONSORT statement checklist

# BMJ Open

## Does internet-based cognitive behaviour therapy reduce healthcare costs and resource use in treatment of social anxiety disorder? A cost- minimisation analysis conducted alongside a randomized controlled trial

|                                 |                                                                                                                                                                                                                                                                                                                                                   |
|---------------------------------|---------------------------------------------------------------------------------------------------------------------------------------------------------------------------------------------------------------------------------------------------------------------------------------------------------------------------------------------------|
| Journal:                        | <i>BMJ Open</i>                                                                                                                                                                                                                                                                                                                                   |
| Manuscript ID                   | bmjopen-2017-017053.R2                                                                                                                                                                                                                                                                                                                            |
| Article Type:                   | Research                                                                                                                                                                                                                                                                                                                                          |
| Date Submitted by the Author:   | 05-Jul-2017                                                                                                                                                                                                                                                                                                                                       |
| Complete List of Authors:       | El Alaoui, Samir; Karolinska Institutet, Department of Clinical Neuroscience<br>Hedman, Erik; Karolinska Institutet, Department of Clinical Neuroscience<br>Ljótsson, Brjánn; Karolinska Institutet, Department of Clinical<br>Neuroscience, Division of Psychology<br>Lindfors, Nils; Karolinska Institutet, Department of Clinical Neuroscience |
| <b>Primary Subject Heading</b>: | Mental health                                                                                                                                                                                                                                                                                                                                     |
| Secondary Subject Heading:      | Health economics                                                                                                                                                                                                                                                                                                                                  |
| Keywords:                       | PSYCHIATRY, Anxiety disorders < PSYCHIATRY, PUBLIC HEALTH                                                                                                                                                                                                                                                                                         |
|                                 |                                                                                                                                                                                                                                                                                                                                                   |

SCHOLARONE™  
Manuscripts

1  
2  
3 **Does internet-based cognitive behaviour therapy reduce healthcare costs and resource**  
4 **use in treatment of social anxiety disorder? A cost-minimisation analysis conducted**  
5 **alongside a randomized controlled trial**  
6  
7  
8  
9

10  
11  
12  
13  
14 Samir El Alaoui, PhD; Erik Hedman, PhD, Brjánn Ljótsson, PhD, and Nils Lindefors, MD,  
15  
16 PhD  
17  
18  
19

20  
21 **Author Affiliations:** Department of Clinical Neuroscience, Division of Psychiatry,  
22 Karolinska Institutet, Stockholm, Sweden (Dr El Alaoui, Dr Lindefors); Department of  
23 Clinical Neuroscience, Osher Center for Integrative Medicine, Karolinska Institutet,  
24 Stockholm, Sweden (Dr Hedman); Department of Clinical Neuroscience, Division of  
25 Psychology, Karolinska Institutet, Stockholm, Sweden (Dr Hedman and Dr Ljótsson)  
26  
27  
28  
29  
30  
31  
32  
33

34 **Corresponding Author:** Samir El Alaoui, PhD, Department of Clinical Neuroscience (CNS),  
35 M58, Karolinska Universitetssjukhuset, Huddinge 141 86 Stockholm, Sweden  
36  
37  
38  
39

40 Email: [samir.el.alaoui@ki.se](mailto:samir.el.alaoui@ki.se)  
41  
42  
43  
44

45 Word count: 3414 (main text); 288 (abstract)  
46

47 Tables: 5  
48

49 Figures: 3  
50  
51  
52  
53  
54  
55  
56  
57  
58  
59  
60

## Abstract

**Objectives:** Social anxiety disorder (SAD) can be effectively treated with internet-delivered cognitive behavioural therapy (ICBT), but studies on long-term cost-minimisation from a healthcare provider perspective in comparison to an evidence-based control treatment of therapeutic equivalence are lacking. The objective of the study was to determine whether ICBT reduces healthcare costs and use of healthcare resources compared to cognitive behavioural group therapy (CBGT).

**Design:** A cost-minimisation study alongside an RCT where participants (N=126) with SAD were randomised to ICBT or to CBGT. Costs measured from a healthcare provider perspective were estimated using time-driven activity based costing alongside health status over four years from baseline measured with EQ-5D.

**Setting:** A psychiatric outpatient clinic in Stockholm, Sweden.

**Participants:** Participants were 126 individuals with social anxiety disorder.

**Primary outcome measures:** Changes in EQ-5D and costs.

**Interventions:** Participants received either CBGT or ICBT for a duration of 15 weeks.

**Results:** Results: ICBT minimized healthcare costs and demonstrated health improvements within the non-inferiority margin. Assuming a practical work capacity for personnel varying between 100%, 80% and 50% of theoretical full capacity, the cost for ICBT varied in the

1  
2  
3 range between 400 €, 463 € and 654 €, while the cost for CBGT varied between 699 €, 806 €  
4  
5 and 1134 €. Within-group effect size was -0.36 (95% CI: -0.70 to -0.01) for ICBT and -0.25  
6  
7 (95% CI: -0.60 to 0.10) for CBGT. Mean use of effective psychologist time in ICBT was  
8  
9 189.60 (SD = 53.77) minutes compared to 499.78 (SD = 30.91) in the CBGT group.  
10

11  
12  
13  
14 **Conclusions:** In treatment of SAD, ICBT is equally effective but is associated with more  
15  
16 efficient staff utilization and less costs compared with CBGT. From a health care provider  
17  
18 perspective, ICBT is an advantageous treatment option.  
19

### 20 21 22 23 **Strengths and limitations of this study**

- 24 • Randomized controlled design.
- 25 • Low attrition rates.
- 26 • Includes long-term follow-up data.
- 27 • It may be difficult to generalize time and cost estimates of resource use to other  
28  
29  
30  
31  
32  
33  
34  
35  
36  
37  
38  
39  
40  
41  
42  
43  
44  
45  
46  
47  
48  
49  
50  
51  
52  
53  
54  
55  
56  
57  
58  
59  
60 settings.

### 40 41 42 43 44 45 46 47 48 49 50 51 52 53 54 55 56 57 58 59 60 <Introduction>

Common mental health problems including depression and anxiety disorders are a major concern globally, and in the UK affecting approximately 17% of the population (1). The cost of these problems in England alone has been estimated at £105.2 billion (approximately 121 billion Euros) which includes costs associated with reduced health-related quality of life, lost productivity and social and health care costs (2). Social anxiety disorder (SAD) is one of the most prevalent anxiety disorders with a 12-month prevalence of 2.8%-7.1% and a lifetime prevalence of 5%-12.1% (3-5). SAD is associated with functional impairment and typically

1  
2  
3 follows a chronic course if untreated (6-9). The National Institute for Health and Care  
4  
5 Excellence (NICE) in the UK recommends cognitive behavioural therapy (CBT) as the first-  
6  
7 line treatment option for SAD (10). Cognitive behavioural group therapy (CBGT) is an  
8  
9 effective format of CBT provision in the treatment of SAD (11, 12). Although many patients  
10  
11 prefer psychological therapies to medication, access is limited in both primary and secondary  
12  
13 care (13).

14  
15  
16 Recently, Internet-based cognitive behaviour therapy (ICBT) has emerged as an  
17  
18 empirically supported treatment for SAD with effect sizes on par with those of CBGT and  
19  
20 tested in at least 16 randomized controlled trials (14). Our research group has previously  
21  
22 compared ICBT to CBGT in a non-inferiority trial and found ICBT to be at least as effective  
23  
24 as CBGT (15). At post-treatment, it was observed that 55% (95% CI, 42.5%–66.9%) of  
25  
26 patients having received ICBT were classified as responders, compared to 34% (95% CI,  
27  
28 22.1%–45.7%) having received CBGT. At six-month follow-up, the corresponding numbers  
29  
30 were 64% (95% CI, 52.3%–75.8%) in the ICBT group and 45% (95% CI, 32.8%–57.6%) in  
31  
32 the CBGT group.  
33  
34

35  
36 Even though some previous studies indicate that ICBT for SAD can be cost-  
37  
38 effective (16, 17), evidence is lacking concerning health economic evaluations from a health  
39  
40 care provider perspective. In the present study, we used the time-driven activity based costing  
41  
42 method, which takes into account all costs related to the treatment from the health care  
43  
44 provider's perspective. To our knowledge, this has not been previously done when evaluating  
45  
46 ICBT for SAD.  
47  
48

49  
50 In health economic evaluations, a choice is often made between four types of  
51  
52 methods: a cost-benefit analysis (CBA) in which both benefits and costs are expressed in  
53  
54 monetary terms; a cost-effectiveness analysis (CEA) where costs and treatment effects are  
55  
56 compared; a cost-utility analysis which is similar to CBA and CEA but where benefits is  
57  
58  
59  
60

1  
2  
3 expressed in terms of quality-adjusted life years (QALYs); and finally, cost-minimisation  
4  
5 analysis (CMA), which focuses on comparing the costs of different treatments with  
6  
7 previously demonstrated equivalence in clinical efficacy.  
8

9  
10 Given the equivalence of both treatment formats in terms of health  
11  
12 improvements previously demonstrated in a randomized controlled trial (15), the purpose of  
13  
14 this study was to assess whether ICBT may help minimize the costs of healthcare use relative  
15  
16 to CBGT. This was done by using both data from a randomized controlled trial and  
17  
18 additionally collected data on resource use. In contrast to previous health economic  
19  
20 evaluations (16, 18), the present study adopted a health care provider perspective using time-  
21  
22 driven activity based costing (TDABC) methodology. If ICBT is found to help minimize the  
23  
24 costs of healthcare use relative to CBGT, such internet-based interventions have the potential  
25  
26 to increase access to psychological therapy in psychiatry and primary care and could represent  
27  
28 an efficient alternative psychological treatment for SAD.  
29  
30

### 31 32 33 34 <Method>

#### 35 36 <Design>

37  
38 This was a cost-minimisation analysis adopting a healthcare provider perspective, conducted  
39  
40 alongside a non-inferiority trial within the context of a parallel group study with unrestricted  
41  
42 randomization in 1:1 ratio (ICBT or CBGT). Costs measured from a healthcare provider  
43  
44 perspective were estimated using time-driven activity based costing alongside with health  
45  
46 status over four years from baseline measured with EQ-5D. All costs were estimated based on  
47  
48 thorough assessment of the costs associated with ICBT when delivered in regular care (which  
49  
50 was implemented at the clinic after the RCT); this was done in order not to underestimate the  
51  
52 treatment costs. The trial was registered at clinicaltrials.gov (identifier NCT00564967). The  
53  
54 main outcome study has been reported elsewhere (15).  
55  
56  
57  
58  
59  
60

1  
2  
3  
4  
5 <Recruitment, inclusion criteria and participants>  
6

7 The study was conducted at a public ICBT unit in Stockholm, Sweden (Stockholm Health  
8 Care Services). Participants were recruited by self-referral (n = 97) or by referral from  
9 primary care physicians and psychiatrists (n = 29). The study protocol was approved by the  
10 Regional Ethical Review Board in Stockholm and informed consent was obtained from all  
11 participants. The recruitment took place between 2007 and 2009. The participant flow  
12 throughout the trial is presented in the main outcome study (15).  
13  
14  
15  
16  
17  
18  
19  
20

21  
22  
23 <Treatments>  
24

25 ≤ Internet-based cognitive behaviour therapy (ICBT)>  
26

27 The internet-delivered treatment was based on and adapted from a treatment originally  
28 developed by Andersson and colleagues and followed a CBT model developed for individual  
29 therapy of SAD (19-21). The treatment content was accessed as text modules similar to  
30 chapters in self-help bibliotherapy. Each chapter corresponded to a CBT session with a  
31 specific theme such as cognitive restructuring, graded exposure or behavioral experiments,  
32 coupled with homework assignments. Patients received supportive email feedback from a  
33 psychologist after each module. The duration of the internet-based intervention was 15 weeks,  
34 and therapists were instructed to restrict time spent on each patient to approximately 10  
35 minutes per week.  
36  
37  
38  
39  
40  
41  
42  
43  
44  
45  
46  
47  
48

49 ≤ Cognitive behavioural group therapy (CBGT)>  
50

51 The group CBT for SAD followed the protocol developed by Heimberg and Becker (2002).  
52 The treatment was equally long as the ICBT (i.e. 15 weeks) consisting of one initial  
53  
54  
55  
56  
57  
58  
59  
60



1  
2  
3 individual session followed by 14 group sessions. Each session was 2.5 hours long and led by  
4  
5 therapists trained in CBT. Each group consisted of six to seven patients.  
6  
7

8  
9  
10 <Outcome measure>

11 EuroQol (EQ-5D) index values were used to assess improvements in health-related quality of  
12  
13 life (EuroQol-Group, 1990). The EQ-5D is non-disease specific and measures five health  
14  
15 domains of importance to quality of life: mobility, self-care, usual activities, pain/discomfort  
16  
17 and anxiety/depression.  
18  
19

20  
21  
22 <Resource use>

23  
24 Resource use was estimated by using a bottom-up approach where the clinical and  
25  
26 administrative activities performed throughout the treatment delivery cycle were first  
27  
28 documented through process maps. This allowed us to identify resource use in terms of type  
29  
30 (e.g. personnel, hospital space, IT) and time (measured in minutes and collected through time  
31  
32 studies and interviews). The time studies and estimations on resource use were conducted at  
33  
34 the treatment facility after the original RCT had been completed, i.e. when the treatment had  
35  
36 been implemented as routine care.  
37  
38  
39

40  
41  
42 <Costs>

43  
44 TDABC was used to determine the costs associated with ICBT and CBGT from a healthcare  
45  
46 provider perspective (22). Based on estimated resource use (described above), the capacity  
47  
48 cost rate (i.e. cost per minute) was calculated for each resource. The overall approach for  
49  
50 calculating capacity cost rates for each resource involved the allocating of costs such as  
51  
52 hospital space, supervision, IT (computers, email, services, etc.) and management evenly per  
53  
54 minute. Costs for hospital space were calculated as the square meter price divided by floor  
55  
56  
57  
58  
59  
60

1  
2  
3 space per staff category and joint surfaces were then allocated. Shared costs included  
4  
5 management as well as shared unit administration. Finally, hospital costs for security and  
6  
7 safety were also included. The minute cost for each personnel category therefore include these  
8  
9 costs. I.e., the minute cost for a psychologist include the allocated costs for IT usage  
10  
11 (including hardware and software), hospital space usage, etc. Economic data for these costs  
12  
13 was provided from the general ledger for the psychiatric department. However, costs related  
14  
15 to prior training of staff and the actual software development of the ICBT platform was not  
16  
17 included; rather the day-to-day costs of administering treatment was the focus of this study.  
18  
19

20  
21 The minute-cost for a psychologist was calculated by dividing the total annual  
22  
23 salary by the total number of minutes worked. Since not all time worked was available for  
24  
25 clinical care due to meetings, training and breaks etc., the practical capacity of each staff  
26  
27 category was estimated to be 80% of the actual number of worked hours, which is typically  
28  
29 used as a standard assumption (22). A sensitivity analysis have been performed to study the  
30  
31 effects of changing this rate down to 50% or up to 100%, presented in a cost-effectiveness  
32  
33 acceptability curve to summarise the uncertainty of the estimates in the cost-effectiveness  
34  
35 analysis.  
36  
37

38  
39 Finally, the total cost of each treatment episode was calculated for each patient  
40  
41 by multiplying the minute cost for each resource with the total number of minutes spent on  
42  
43 each activity and then summing across all resources. Time estimates (and thus costs) not  
44  
45 related to psychologists (e.g. assessments by medical doctors and administrative tasks by  
46  
47 nurses and secretaries outside of treatment) were assumed to be similar in both groups. In  
48  
49 addition to calculating actual costs, costs were also estimated when discounted at annual rates  
50  
51 of 3% and 5% respectively, and presented in €, year 2017 values.  
52  
53  
54

55  
56 <Cost-minimisation analysis>  
57  
58  
59  
60

1  
2  
3 Since the main outcome study have demonstrated equivalence in treatment efficacy, we chose  
4 to conduct a CMA where costs per course of treatment from a healthcare provider perspective  
5 were calculated and compared between treatment groups; if total costs were reduced by more  
6 efficient resource use, cost-minimisation may be achieved (23). In order to avoid biased  
7 estimation of uncertainty, we have used the statistical methods of cost-effectiveness to  
8 evaluate the joint distributions of costs and benefits.  
9  
10  
11  
12  
13  
14  
15

16 The cost-effectiveness analysis was conducted through the following steps: (1)  
17 calculation of costs and effects of each intervention (2) calculation of the differences in cost  
18 and differences in effects and (3) calculating the incremental cost and incremental benefit of  
19 ICBT versus CBGT and (4) and presenting the distribution of cost/effect differences on a  
20 cost-effectiveness plane with confidence interval estimation around the calculated ratio (24).  
21 If ICBT is found to be equally effective but less costly, it will be located in the south  
22 quadrants of the cost-effectiveness plan close to the y-axis. The question then arises whether  
23 the cost saving of ICBT is worth the health loss or health gain.  
24  
25  
26  
27  
28  
29  
30  
31  
32  
33  
34  
35  
36  
37  
38  
39

#### 40 <Sensitivity analysis>

41 A probability sensitivity analysis was performed to estimate the uncertainty surrounding the  
42 cost-effectiveness ratios. Confidence ellipses at 50%, 75%, and 95% were calculated and  
43 cost-effectiveness acceptability curves (CEACs) were constructed to represent the uncertainty  
44 around the estimate (25) in accordance with recommended guidelines (26). Incremental net  
45 benefit (INB) was used to interpret the CEAC, where the slope of the net monetary benefits  
46 (NMB) curve represents the difference in effects between ICBT and CBGT.  
47  
48  
49  
50  
51  
52  
53  
54  
55

#### 56 <Results>

57  
58  
59  
60

1  
2  
3 <Outcomes>  
4

5 As previously reported (18) the between-group effect size on EQ5D was -0.18 (95% CI: -0.53  
6 to 0.17), indicating equivalence in treatment effects. The within-group effect size was -0.36  
7 (95% CI: -0.70 to -0.01) for ICBT and -0.25 (95% CI: -0.60 to 0.10) for CBGT. Treatment  
8 adherence was similar across treatment conditions; out of possible 15 sessions and modules  
9 respectively, mean number of attended sessions was 9.40 (SD = 4.87) in the CBGT group  
10 and 9.33 (SD = 4.95) in the ICBT group. As previously reported, number of attended  
11 treatment sessions/completed modules was positively related to treatment outcome (27).  
12  
13  
14  
15  
16  
17  
18  
19  
20  
21  
22

23 <Resource use>  
24

25 An independent-samples t-test was conducted to compare psychologist time in ICBT and  
26 CBGT treatments. There was a significantly lower use of psychologist time in ICBT (M =  
27 189.60, SD = 53.77) compared to CBGT (M = 499.78, SD = 30.91), with a mean difference  
28 of 310.16 (95% CI: 248.47 to 371.86) minutes;  $t(124) = 9.95, p < .001$ . Table 1 presents  
29 average number of minutes consumed per resource category over a complete cycle of care.  
30  
31  
32  
33  
34  
35  
36  
37  
38  
39  
40  
41  
42

43 INSERT TABLE 1 ABOUT HERE.  
44

45 <Costs and cost-minimisation>  
46

47 Assuming a practical capacity of 80% of full theoretical capacity for healthcare staff, mean  
48 total healthcare costs are reported in Table 1. Taking into account the complete treatment  
49 episode, total estimated cost for ICBT was 463 € (95% CI: 446 € to 480 €) per patient  
50 compared with 806 € (95% CI: 730 € to 883 €) for CBGT. Table 1 also presents the average  
51 costs for each resource involved in the complete care episode, where costs of hospital space,  
52 supervision, IT and management has been allocated over each staff category.  
53  
54  
55  
56  
57  
58  
59  
60

1  
2  
3 Estimated capacity cost rates (cost per minute) for each staff category are  
4 presented in Table 2 for different assumptions of practical capacity. Estimations indicate that  
5 the cost per minute increases as less time is spent on clinical work.  
6  
7  
8  
9

10  
11  
12 INSERT TABLE 2 ABOUT HERE.  
13

14  
15  
16 Estimated healthcare cost for different assumptions of practical capacity is  
17 presented in Table 3. Assuming that staff spends 100% of their theoretical full capacity on  
18 clinical work directly related to the treatment processes, the total cost of CBGT is estimated at  
19 699 € (95% CI: 632 € to 765 €) compared to 400 € (95% CI: 386 € to 415 €) for ICBT.  
20  
21  
22  
23  
24  
25  
26

27  
28 INSERT TABLE 3 ABOUT HERE.  
29  
30

31  
32 The estimated cost-savings of ICBT relative to CBGT at different assumptions  
33 of practical capacity is presented in Table 4, ranging from 299 € (95% CI: 232 € to 356 €) to  
34 481 € (95% CI: 374 € to 587 €). Assuming a practical capacity of 80%, the cost-saving is  
35 estimated to be 343 € (95% CI: 267 € to 420 €).  
36  
37  
38  
39  
40  
41  
42

43  
44 INSERT TABLE 4 ABOUT HERE.  
45  
46

47 Fig. 1 illustrates confidence-ellipses around the point estimate; as the 95% and  
48 75% confidence ellipses occupy both the south-east (SE) and south-west (SW) quadrants, this  
49 indicates that the ICBT treatment was equally effective but less costly relative to the CBGT  
50 intervention; the entire density within the ellipses involves cost-savings. Table 5 presents  
51 costs and mean differences when taking account of time (at an assumption of 80% practical  
52  
53  
54  
55  
56  
57  
58  
59  
60

1  
2  
3 capacity), assuming 3% and 5% annual discount rates; when costs were discounted at 3%, the  
4  
5 mean difference was 305 € (95% CI: 237 € to 373 €) and 283 € (95% CI: 220 € to 345 €) at a  
6  
7 5% discount rate.  
8  
9

10  
11  
12 INSERT TABLE 5 ABOUT HERE  
13

14  
15  
16 INSERT FIG. 1 ABOUT HERE  
17  
18  
19

20  
21 Cost-effectiveness acceptability curves (CEAC) are presented in **Fig. 2**, including a  
22  
23 sensitivity analysis of different assumptions of practical capacity applied in the calculation of  
24  
25 cost rates. The CEACs indicate the probability that ICBT is cost-effective compared with  
26  
27 CBGT for a given value of the maximum willingness to pay (WTP) for a gained unit of  
28  
29 health-related quality of life. As can be seen, the probability for ICBT being cost-effective is  
30  
31 high regardless of WTP.  
32  
33

34  
35  
36 INSERT FIG. 2 ABOUT HERE  
37  
38  
39

40  
41 A graphical representation of the net benefit is illustrated in Fig. 3. The uncertainty of the  
42  
43 value of the intervention gets larger as the WTP for the clinical outcome increases; this is  
44  
45 reflected in the increasing CI of the INB. The positive NMBs suggest that the intervention is  
46  
47 cost-effective at four year follow-up assessment.  
48  
49

50  
51  
52 INSERT FIG. 3 ABOUT HERE  
53  
54  
55

56 <Discussion>  
57  
58  
59  
60

1  
2  
3 < *Principal findings* >  
4

5 The objective of this study was to assess whether ICBT is less costly relative to CBGT in the  
6  
7 treatment of patients with SAD. While clinical treatment effects were equivalent, healthcare  
8  
9 costs were lower in the ICBT group (463 €) compared with the CBGT group (806 €),  
10  
11 assuming a practical capacity of around 80%. This study thus showed that ICBT for SAD is  
12  
13 clearly less costly compared to CBGT from a health care provider perspective. These results  
14  
15 add to the previous body of research demonstrating that ICBT is associated with improved  
16  
17 economic outcomes. (28) However, most health economic evaluations have mainly been  
18  
19 performed from a societal perspective. By using a healthcare provider perspective, and a  
20  
21 TDABC costing approach, this study may help to develop a greater understanding of the costs  
22  
23 incurred by the resources used throughout the clinical care of patients and by their  
24  
25 administrative processes.  
26  
27  
28  
29  
30  
31

32 < *Implications for policy and practice* >  
33

34 Evidence suggests that ICBT is equally effective as the more commonly provided face-to-face  
35  
36 CBT, not only for SAD (15, 29) but for a wide range of mood and anxiety disorders (30),  
37  
38 while requiring less healthcare resources. Therefore, ICBT may have a number of advantages  
39  
40 that would benefit both health care providers and patients. First, since ICBT requires  
41  
42 significantly less therapist time, each therapist is able to treat more patients simultaneously,  
43  
44 consequentially increasing treatment availability and shortening waiting lists. Another  
45  
46 advantage is that ICBT overcomes geographic barriers for patients and thus to provide access  
47  
48 to evidence based psychological treatment at more equal opportunities. Finally, accessing  
49  
50 therapy sessions online is practical and more economical for patients because it enables them  
51  
52 to work with the treatment at their own convenience, and not having to take time off work for  
53  
54 making visits to their healthcare provider. To further increase access to evidence based  
55  
56  
57  
58  
59  
60

1  
2  
3 psychological interventions for SAD, ICBT may be considered as an alternative to face-to-  
4  
5 face psychological therapies as an initial step within a stepped care approach. This should also  
6  
7 be considered for other evidence based ICBT applications such as in depression and panic  
8  
9 disorder.  
10

11  
12  
13  
14 <Strengths and limitations>

15  
16 The main strengths of the present study were the randomized controlled design, the direct  
17  
18 comparison of ICBT against face-to-face CBT, and the low attrition rates. However, the study  
19  
20 had some limitations.  
21

22  
23 First, the use of TDABC as a costing methodology in healthcare is relatively  
24  
25 new, particularly within mental health care; it has been more commonly used in industry. (31-  
26  
27 33) Therefore, its validity may be difficult to evaluate at this stage. Also, although CBT  
28  
29 treatment delivery may be similar across different healthcare providers, supporting  
30  
31 administrative processes and clinical practices might differ significantly. As a result, it may  
32  
33 be difficult to generalize time and cost estimates of the total healthcare episode to other  
34  
35 settings and healthcare providers.  
36  
37

38  
39 A second limitation relates to difficulties in arriving at accurate time estimates  
40  
41 of resource use and activities performed. Since actual logging of time requires an electronic  
42  
43 measurement system, only accurate timing of the amount of time each psychologist spent with  
44  
45 each patient in ICBT could be recorded (thus providing measures of variability), whereas  
46  
47 other clinical and administrative processes were based on estimated average standard times.  
48

49  
50 Third, parts of the time studies and estimations on resource use were carried out  
51  
52 several years after the original RCT, i.e. when the treatment had been implemented as routine  
53  
54 care. Although administrative routines and processes have remained more or less similar over  
55  
56 the years, there may still be minor differences when compared to how the administrative  
57  
58  
59  
60



1  
2  
3 processes were during the RCT. Therefore, difficulties in retrieving exact cost data may add  
4  
5 to the uncertainty around cost estimates.  
6

7  
8 Fourth, since our study is based on a non-inferiority trial with observed  
9  
10 equivalence in treatment effects, the confidence interval suggested some uncertainty around  
11  
12 the estimated effect. This concern in cost-effectiveness analyses have been discussed by  
13  
14 Briggs and O'Brien (34); in line with the recommendations outlined in the article, we have  
15  
16 aimed at providing an appropriate representation of uncertainty using confidence-ellipses on  
17  
18 the cost-effectiveness plane.  
19

20  
21 Finally, we will comment on the choice of cost-minimisation analysis in the  
22  
23 present study. Economic evaluations in healthcare compare treatment options or technologies  
24  
25 in terms of clinical effects and costs, typically resulting in a cost-effectiveness ratio. The  
26  
27 incremental cost-effectiveness ratio (ICER) summarises the cost-effectiveness of a treatment  
28  
29 relative to an alternative by calculating the difference in costs between the two divided by the  
30  
31 difference in effects (23). We have previously estimated an ICER from a societal perspective  
32  
33 using the formula  $(C_{ICBT} - C_{CBGT}) / (E_{ICBT} - E_{CBGT})$ , where  $C_{ICBT}$  and  $E_{ICBT}$  represents the cost  
34  
35 and effect in the ICBT group and where  $C_{CBGT}$  and  $E_{CBGT}$  represent the cost and effect in the  
36  
37 CBGT group (16, 18). The difference between cost-effectiveness analysis (CEA) and cost-  
38  
39 minimisation analysis (CMA) has been further discussed elsewhere (35); a full cost-  
40  
41 effectiveness analysis is often a preferred method to assess differences in both costs and  
42  
43 effects. However, in the context of a non-inferiority trial where treatments have been found to  
44  
45 be equally effective, CMA may be an appropriate method to analyze cost differences (23),  
46  
47 since the focus of interest is which treatment is less expensive. Since both treatments in this  
48  
49 study were found to have equivalent efficacy, estimating an ICER may not be the optimal  
50  
51 approach as the ICER approaches infinity when effect difference is close to zero. However, if  
52  
53  
54  
55  
56  
57  
58  
59  
60

1  
2  
3 ICBT can reduce resource use in treatment of SAD, it may lower healthcare costs. Therefore,  
4  
5 a cost-minimisation approach was considered more appropriate in this case.  
6  
7

8  
9 <Conclusion>  
10

11 In treatment of SAD, ICBT is equally effective but is associated with more efficient staff  
12  
13 utilization and considerably lower costs compared with CBGT. From a health care provider  
14  
15 perspective, ICBT is an advantageous treatment option.  
16  
17  
18  
19  
20  
21  
22  
23  
24  
25  
26  
27  
28  
29  
30  
31  
32  
33  
34  
35  
36  
37  
38  
39  
40  
41  
42  
43  
44  
45  
46  
47  
48  
49  
50  
51  
52  
53  
54  
55  
56  
57  
58  
59  
60

1  
2  
3  
4  
5 **Acknowledgments:** We thank Mrs. Ann Edholm-Johansson and the late Mr. Stefan  
6  
7 Lundkvist at Stockholm Healthcare Services, Psychiatry Division, for assembling and  
8  
9 calculating some of the cost data.  
10

11  
12  
13  
14 **Contributions of authors:** SAE designed the study, performed the analyses, collected and  
15  
16 interpreted the data and drafted the paper. EH designed the study, developed the SAD  
17  
18 treatment, performed the analyses, and drafted the paper. NL and BL designed the study,  
19  
20 interpreted the data, and drafted the paper.  
21  
22  
23

24  
25 **Samir El Alaoui**, PhD, Karolinska Institutet, Dept of Clin. Neuroscience, Stockholm,  
26  
27 Sweden, **Erik Hedman**, PhD, Karolinska Institutet, Dept of Clin. Neuroscience, Stockholm,  
28  
29 Brjánn Ljótsson, PhD, Karolinska Institutet, Dept of Clin. Neuroscience, Stockholm, Sweden  
30  
31 & **Nils Lindfors**, PhD, Karolinska Institutet, Dept of Clin. Neuroscience, Stockholm,  
32  
33 Sweden  
34  
35  
36  
37

38 **Correspondence:** Samir El Alaoui, PhD, Department of Clinical Neuroscience (CNS), M58,  
39  
40 Karolinska Universitetssjukhuset, Huddinge 141 86 Stockholm, Sweden.  
41  
42 (samir.el.alaoui@ki.se).  
43  
44  
45  
46

47 **Funding:** This research was funded by Karolinska Institutet and Stockholm County Council,  
48  
49 none of which had any role in the design, execution or publication of the study.  
50  
51

52  
53  
54 **Competing interests:** None declared.  
55  
56  
57  
58  
59  
60

1  
2  
3 **Data sharing statement:** Study data are stored at the repository of Karolinska Institutet. With  
4 respect to the legal framework regulating access to research data in Sweden, the data are not  
5 freely accessible due to regulations regarding personal integrity in research, public access and  
6 privacy; each request is therefore assessed by the Karolinska Institutet ethics committee, and  
7 approval of data access can be given after this assessment. To request data, contact Karolinska  
8 Institutet by e-mail at [info@ki.se](mailto:info@ki.se), or at Karolinska Institutet, SE-171 77, Stockholm, Sweden.  
9  
10  
11  
12  
13  
14  
15  
16  
17  
18  
19  
20  
21  
22  
23

24 **Fig. 1.** *Mean differences in costs and gained health-related quality of life.*  
25  
26  
27

28 Note. Each confidence-ellipse represents regions with a 50%, 75% or 95% certainty around  
29 the mean difference in cost and effect. Abbreviations: ICBT, internet-based cognitive  
30 behaviour therapy.  
31  
32  
33  
34  
35  
36

37 **Fig. 2.** *Cost-effectiveness acceptability curves for different assumptions of practical capacity.*  
38  
39

40 Note. The cost-effectiveness acceptability curves shows for different assumptions of  
41 personnel's practical work capacity of their full theoretical capacity, the probabilities that  
42 ICBT is cost-effective with changes in the amount that society is willing to pay for a unit  
43 increase in health related quality of life, considering healthcare costs.  
44  
45  
46  
47  
48  
49  
50

51 **Fig. 3.** *Net monetary benefit curves and 95% confidence intervals at 4-year follow-up.*  
52  
53  
54  
55  
56  
57  
58  
59  
60

## Tables

**Table 1.** Estimation of a patient's cost over a complete cycle of care for treating social anxiety disorder with ICBT or with CBGT

|                                                | Coordinating nurse |              | Psychiatrist    |              | Resident physician |              | Psychologist    |              | Medical secretary |              | Total           |              |
|------------------------------------------------|--------------------|--------------|-----------------|--------------|--------------------|--------------|-----------------|--------------|-------------------|--------------|-----------------|--------------|
|                                                | Average minutes    | Average cost | Average minutes | Average cost | Average minutes    | Average cost | Average minutes | Average cost | Average minutes   | Average cost | Average minutes | Average cost |
| <b>ICBT</b>                                    |                    |              |                 |              |                    |              |                 |              |                   |              |                 |              |
| Registration and verification                  | 11                 | 13€          | 0               | 0€           | 0                  | 0€           | 0               | 0€           | 0                 | 0€           | 11              | 13€          |
| Diagnostic assessment                          | 0                  | 0€           | 20              | 43€          | 80                 | 112€         | 0               | 0€           | 0                 | 0€           | 100             | 154€         |
| Supervision meeting / discussion               | 0                  | 0€           | 3               | 6€           | 3                  | 4€           | 1               | 1€           | 0                 | 0€           | 7               | 11€          |
| Supplementary psychological assessment         | 0                  | 0€           | 0               | 0€           | 0                  | 0€           | 5               | 7€           | 0                 | 0€           | 5               | 7€           |
| Administrating treatment activation            | 0                  | 0€           | 0               | 0€           | 0                  | 0€           | 0               | 0€           | 41                | 41€          | 41              | 41€          |
| ICBT intervention (online)                     | 0                  | 0€           | 0               | 0€           | 0                  | 0€           | 82              | 102€         | 0                 | 0€           | 82              | 102€         |
| ICBT intervention (offline)                    | 0                  | 0€           | 0               | 0€           | 0                  | 0€           | 77              | 95€          | 0                 | 0€           | 77              | 95€          |
| Administrative preparation for follow-up visit | 3                  | 3€           | 0               | 0€           | 0                  | 0€           | 0               | 0€           | 0                 | 0€           | 3               | 3€           |
| Post-treatment clinical visit                  | 0                  | 0€           | 0               | 0€           | 0                  | 0€           | 24              | 30€          | 0                 | 0€           | 24              | 30€          |
| Discharge                                      | 0                  | 0€           | 0               | 0€           | 0                  | 0€           | 0               | 0€           | 5                 | 5€           | 5               | 5€           |
| <b>Total</b>                                   | <b>14</b>          | <b>17€</b>   | <b>23</b>       | <b>49€</b>   | <b>83</b>          | <b>116€</b>  | <b>190</b>      | <b>235€</b>  | <b>46</b>         | <b>46€</b>   | <b>355</b>      | <b>463€</b>  |
| <b>CBGT</b>                                    |                    |              |                 |              |                    |              |                 |              |                   |              |                 |              |
| Registration and verification                  | 11                 | 13€          | 0               | 0€           | 0                  | 0€           | 0               | 0€           | 0                 | 0€           | 11              | 13€          |
| Diagnostic assessment                          | 0                  | 0€           | 20              | 43€          | 80                 | 112€         | 0               | 0€           | 0                 | 0€           | 100             | 154€         |
| Supervision meeting / discussion               | 0                  | 0€           | 3               | 6€           | 3                  | 4€           | 1               | 1€           | 0                 | 0€           | 7               | 11€          |
| Supplementary psychological assessment         | 0                  | 0€           | 0               | 0€           | 0                  | 0€           | 5               | 7€           | 0                 | 0€           | 5               | 7€           |

|    |                                                |           |            |           |            |           |             |            |             |          |           |            |             |
|----|------------------------------------------------|-----------|------------|-----------|------------|-----------|-------------|------------|-------------|----------|-----------|------------|-------------|
| 1  |                                                |           |            |           |            |           |             |            |             |          |           |            |             |
| 2  |                                                |           |            |           |            |           |             |            |             |          |           |            |             |
| 3  |                                                |           |            |           |            |           |             |            |             |          |           |            |             |
| 4  |                                                |           |            |           |            |           |             |            |             |          |           |            |             |
| 5  | CBGT intervention                              | 0         | 0€         | 0         | 0€         | 0         | 0€          | 470        | 582€        | 0        | 0€        | 470        | 582€        |
| 6  | Administrative preparation for follow-up visit | 3         | 3€         | 0         | 0€         | 0         | 0€          | 0          | 0€          | 0        | 0€        | 3          | 3€          |
| 7  | Post-treatment clinical visit                  | 0         | 0€         | 0         | 0€         | 0         | 0€          | 24         | 30€         | 0        | 0€        | 24         | 30€         |
| 8  | Discharge                                      | 0         | 0€         | 0         | 0€         | 0         | 0€          | 0          | 0€          | 5        | 5€        | 5          | 5€          |
| 9  |                                                |           |            |           |            |           |             |            |             |          |           |            |             |
| 10 |                                                |           |            |           |            |           |             |            |             |          |           |            |             |
| 11 | <b>Total</b>                                   | <b>14</b> | <b>17€</b> | <b>23</b> | <b>49€</b> | <b>83</b> | <b>116€</b> | <b>500</b> | <b>619€</b> | <b>5</b> | <b>5€</b> | <b>625</b> | <b>806€</b> |
| 12 |                                                |           |            |           |            |           |             |            |             |          |           |            |             |
| 13 |                                                |           |            |           |            |           |             |            |             |          |           |            |             |
| 14 |                                                |           |            |           |            |           |             |            |             |          |           |            |             |
| 15 |                                                |           |            |           |            |           |             |            |             |          |           |            |             |
| 16 |                                                |           |            |           |            |           |             |            |             |          |           |            |             |
| 17 |                                                |           |            |           |            |           |             |            |             |          |           |            |             |
| 18 |                                                |           |            |           |            |           |             |            |             |          |           |            |             |
| 19 |                                                |           |            |           |            |           |             |            |             |          |           |            |             |
| 20 |                                                |           |            |           |            |           |             |            |             |          |           |            |             |
| 21 |                                                |           |            |           |            |           |             |            |             |          |           |            |             |
| 22 |                                                |           |            |           |            |           |             |            |             |          |           |            |             |
| 23 |                                                |           |            |           |            |           |             |            |             |          |           |            |             |
| 24 |                                                |           |            |           |            |           |             |            |             |          |           |            |             |
| 25 |                                                |           |            |           |            |           |             |            |             |          |           |            |             |
| 26 |                                                |           |            |           |            |           |             |            |             |          |           |            |             |
| 27 |                                                |           |            |           |            |           |             |            |             |          |           |            |             |
| 28 |                                                |           |            |           |            |           |             |            |             |          |           |            |             |
| 29 |                                                |           |            |           |            |           |             |            |             |          |           |            |             |
| 30 |                                                |           |            |           |            |           |             |            |             |          |           |            |             |
| 31 |                                                |           |            |           |            |           |             |            |             |          |           |            |             |
| 32 |                                                |           |            |           |            |           |             |            |             |          |           |            |             |
| 33 |                                                |           |            |           |            |           |             |            |             |          |           |            |             |
| 34 |                                                |           |            |           |            |           |             |            |             |          |           |            |             |
| 35 |                                                |           |            |           |            |           |             |            |             |          |           |            |             |
| 36 |                                                |           |            |           |            |           |             |            |             |          |           |            |             |
| 37 |                                                |           |            |           |            |           |             |            |             |          |           |            |             |
| 38 |                                                |           |            |           |            |           |             |            |             |          |           |            |             |
| 39 |                                                |           |            |           |            |           |             |            |             |          |           |            |             |
| 40 |                                                |           |            |           |            |           |             |            |             |          |           |            |             |
| 41 |                                                |           |            |           |            |           |             |            |             |          |           |            |             |
| 42 |                                                |           |            |           |            |           |             |            |             |          |           |            |             |
| 43 |                                                |           |            |           |            |           |             |            |             |          |           |            |             |
| 44 |                                                |           |            |           |            |           |             |            |             |          |           |            |             |
| 45 |                                                |           |            |           |            |           |             |            |             |          |           |            |             |
| 46 |                                                |           |            |           |            |           |             |            |             |          |           |            |             |
| 47 |                                                |           |            |           |            |           |             |            |             |          |           |            |             |
| 48 |                                                |           |            |           |            |           |             |            |             |          |           |            |             |
| 49 |                                                |           |            |           |            |           |             |            |             |          |           |            |             |

## HEALTH ECONOMIC EVALUATION OF ICBT FOR SAD

*Table 2. Cost rates (€/minute) at different assumptions of practical capacity.*

| Practical capacity assumption | Medical secretaries | Psychiatrist | Resident Physician | Psychologists | Coordinating nurse |
|-------------------------------|---------------------|--------------|--------------------|---------------|--------------------|
| <b>100%</b>                   | 0,90                | 1,79         | 1,19               | 1,08          | 1,06               |
| <b>80%</b>                    | 1,02                | 2,13         | 1,40               | 1,24          | 1,21               |
| <b>50%</b>                    | 1,38                | 3,14         | 2,02               | 1,73          | 1,67               |

For peer review only

## HEALTH ECONOMIC EVALUATION OF ICBT FOR SAD

Table 3. Estimated healthcare cost for different assumptions of practical capacity.

|      | Assumed practical capacity | N  | Cost (€) | 95% Confidence Interval |       |
|------|----------------------------|----|----------|-------------------------|-------|
|      |                            |    |          | Lower                   | Upper |
| CBGT | 50%                        | 62 | 1134     | 1027                    | 1241  |
|      | 80%                        | 62 | 806      | 730                     | 883   |
|      | 100%                       | 62 | 699      | 632                     | 765   |
| ICBT | 50%                        | 64 | 654      | 630                     | 677   |
|      | 80%                        | 64 | 463      | 446                     | 480   |
|      | 100%                       | 64 | 400      | 386                     | 415   |



## HEALTH ECONOMIC EVALUATION OF ICBT FOR SAD

Table 4. Estimated mean differences in healthcare cost between ICBT and CBGT for different assumptions of practical capacity

| Assumed practical capacity of full theoretical capacity | Mean cost difference (€) | 95% Confidence Interval of the Difference |       |
|---------------------------------------------------------|--------------------------|-------------------------------------------|-------|
|                                                         |                          | Lower                                     | Upper |
| 50%                                                     | 481                      | 374                                       | 587   |
| 80%                                                     | 343                      | 267                                       | 420   |
| 100%                                                    | 299                      | 232                                       | 365   |

Note. Independent-samples t-test were conducted to compare total costs for ICBT and CBGT for different levels of assumed practical capacity in relation to theoretical full capacity, indicating significant differences in healthcare costs;  $t(124)=8.9$ ,  $p < .001$ .

## HEALTH ECONOMIC EVALUATION OF ICBT FOR SAD

**Table 5.** *Estimation of actual and discounted costs of care for treating social anxiety disorder with ICBT or with CBGT*

|                                        | Group | N  | Mean cost, € | SD  | Mean difference, € | 95% Confidence Interval of the Difference |       |
|----------------------------------------|-------|----|--------------|-----|--------------------|-------------------------------------------|-------|
|                                        |       |    |              |     |                    | Lower                                     | Upper |
| Total costs, actual                    | CBGT  | 62 | 806          | 302 |                    |                                           |       |
|                                        | ICBT  | 64 | 463          | 67  | 343                | 267                                       | 420   |
| Total costs, discounted at 3% per year | CBGT  | 62 | 717          | 268 |                    |                                           |       |
|                                        | ICBT  | 64 | 411          | 59  | 305                | 237                                       | 373   |
| Total costs, discounted at 5% per year | CBGT  | 62 | 663          | 248 |                    |                                           |       |
|                                        | ICBT  | 64 | 381          | 55  | 283                | 220                                       | 345   |

## &lt; References &gt;

1. Bebbington P, Brugha T, Coid J, Crawford M, Deverill C, D'Souza J, et al. Adult Psychiatric Morbidity in England, 2007: Results of a Household Survey. Social Care Statistics. 2009.
2. The economic and social costs of mental health problems in 2009/10. Centre for Mental Health, 2010.
3. Kessler RC, Chiu WT, Demler O, Merikangas KR, Walters EE. Prevalence, severity, and comorbidity of 12-month DSM-IV disorders in the National Comorbidity Survey Replication. Arch Gen Psychiatry. 2005; 62(6): 617-27.
4. Ruscio AM, Brown TA, Chiu WT, Sareen J, Stein MB, Kessler RC. Social fears and social phobia in the USA: results from the National Comorbidity Survey Replication. Psychol Med. 2008; 38(1): 15-28.
5. Grant BF, Hasin DS, Blanco C, Stinson FS, Chou SP, Goldstein RB, et al. The epidemiology of social anxiety disorder in the United States: results from the National Epidemiologic Survey on Alcohol and Related Conditions. The Journal of clinical psychiatry. 2005; 66(11): 1351-61.
6. Kessler RC, Chiu WT, Demler O, Walters EE. Prevalence, Severity, and Comorbidity of 12-Month DSM-IV Disorders in the National Comorbidity Survey Replication. Arch Gen Psychiatry. 2005; 62(6): 617-27.
7. Kessler RC, Berglund P, Demler O, Jin R, Merikangas KR, Walters EE. Lifetime prevalence and age-of-onset distributions of DSM-IV disorders in the National Comorbidity Survey Replication. Arch Gen Psychiatry. 2005; 62(6): 593-602.
8. Wittchen HU, Fehm L. Epidemiology and natural course of social fears and social phobia. Acta Psychiatr Scand Suppl. 2003; (417): 4-18.

## HEALTH ECONOMIC EVALUATION OF ICBT FOR SAD

- 1  
2  
3 9. Yonkers KA, Dyck IR, Keller MB. An eight-year longitudinal comparison of  
4  
5 clinical course and characteristics of social phobia among men and women. *Psychiatr*  
6  
7 *Serv.* 2001; 52(5): 637-43.
- 8  
9 10. Health NCCfM. Social anxiety disorder: recognition, assessment and  
10  
11 treatment. In: National Clinical Guideline Number 159: 2013.
- 12  
13 11. Heimberg RG, Dodge CS, Hope DA, Kennedy CR, Zollo LJ, Becker RE.  
14  
15 Cognitive behavioral group treatment for social phobia: Comparison with a credible  
16  
17 placebo control. *Cognitive Ther Res.* 1990; 14(1): 1-23.
- 18  
19 20 12. Blanco C, Heimberg RG, Schneier FR, Fresco DM, Chen H, Turk CL, et al. A  
21  
22 Placebo-Controlled Trial of Phenelzine, Cognitive Behavioral Group Therapy, and Their  
23  
24 Combination for Social Anxiety Disorder. *Arch Gen Psychiatry.* 2010; 67(3): 286-95.
- 25  
26 27 13. Cavanagh K. Geographic Inequity in the Availability of Cognitive  
28  
29 Behavioural Therapy in England and Wales: A 10-Year Update. *Behav Cogn Psychother.*  
30  
31 2013: 1-5.
- 32  
33 34 14. Hedman E, Ljótsson B, Lindfors N. Cognitive behavior therapy via the  
35  
36 Internet: a systematic review of applications, clinical efficacy and cost-effectiveness.  
37  
38 *Expert Rev Pharmacoecon Outcomes Res.* 2012; 12(6): 745-64.
- 39  
40 41 15. Hedman E, Andersson G, Ljotsson B, Andersson E, Ruck C, Mortberg E, et al.  
42  
43 Internet-based cognitive behavior therapy vs. cognitive behavioral group therapy for  
44  
45 social anxiety disorder: a randomized controlled non-inferiority trial. *PloS one.* 2011;  
46  
47 6(3): e18001.
- 48  
49 50 16. Hedman E, Andersson E, Ljotsson B, Andersson G, Ruck C, Lindfors N. Cost-  
51  
52 effectiveness of Internet-based cognitive behavior therapy vs. cognitive behavioral  
53  
54 group therapy for social anxiety disorder: results from a randomized controlled trial.  
55  
56 *Behaviour research and therapy.* 2011; 49(11): 729-36.
- 57  
58  
59  
60

## HEALTH ECONOMIC EVALUATION OF ICBT FOR SAD

- 1  
2  
3 17. Titov N, Andrews G, Johnston L, Schwencke G, Choi I. Shyness programme:  
4  
5 longer term benefits, cost-effectiveness, and acceptability. The Australian and New  
6  
7 Zealand journal of psychiatry. 2009; 43(1): 36-44.  
8  
9  
10 18. Hedman E, El Alaoui S, Lindefors N, Andersson E, Ruck C, Ghaderi A, et al.  
11  
12 Clinical effectiveness and cost-effectiveness of Internet- vs. group-based cognitive  
13  
14 behavior therapy for social anxiety disorder: 4-Year follow-up of a randomized trial.  
15  
16 Behaviour research and therapy. 2014; 59C: 20-9.  
17  
18  
19 19. Clark DM, Wells A. A cognitive model of social phobia. In: Social phobia:  
20  
21 Diagnosis, assessment and treatment. Guilford press, 1995.  
22  
23  
24 20. Carlbring P, Gunnarsdottir M, Hedensjo L, Andersson G, Ekselius L, Furmark  
25  
26 T. Treatment of social phobia: randomised trial of internet-delivered cognitive-  
27  
28 behavioural therapy with telephone support. The British journal of psychiatry : the  
29  
30 journal of mental science. 2007; 190: 123-8.  
31  
32  
33 21. Tillfors M, Carlbring P, Furmark T, Lewenhaupt S, Spak M, Eriksson A, et al.  
34  
35 Treating university students with social phobia and public speaking fears: Internet  
36  
37 delivered self-help with or without live group exposure sessions. Depression and  
38  
39 anxiety. 2008; 25(8): 708-17.  
40  
41  
42 22. Kaplan RS, Anderson SR. Time-driven activity-based costing. Harvard Bus  
43  
44 Rev. 2004; 82(11): 131-+.  
45  
46  
47 23. Drummond MF. Methods for the economic evaluation of health care  
48  
49 programmes. Oxford University Press, 2005.  
50  
51  
52 24. Nixon RM, Wonderling D, Grieve RD. Non-parametric methods for cost-  
53  
54 effectiveness analysis: the central limit theorem and the bootstrap compared. Health  
55  
56 Econ. 2010; 19(3): 316-33.  
57  
58  
59  
60

## HEALTH ECONOMIC EVALUATION OF ICBT FOR SAD

- 1  
2  
3 25. Fenwick E, O'Brien BJ, Briggs A. Cost-effectiveness acceptability curves--  
4 facts, fallacies and frequently asked questions. *Health Econ.* 2004; 13(5): 405-15.  
5  
6  
7 26. Glick HA, Briggs AH, Polsky D. Quantifying stochastic uncertainty and  
8 presenting results of cost-effectiveness analyses. *Expert review of pharmacoeconomics  
9 & outcomes research.* 2001; 1(1): 25-36.  
10  
11  
12 27. Hedman E, Andersson E, Ljotsson B, Andersson G, Andersson E, Schalling M,  
13 et al. Clinical and genetic outcome determinants of internet- and group-based cognitive  
14 behavior therapy for social anxiety disorder. *Acta psychiatrica Scandinavica.* 2012;  
15 126(2): 126-36.  
16  
17  
18 28. Hedman E, Ljotsson B, Lindefors N. Cognitive behavior therapy via the  
19 Internet: a systematic review of applications, clinical efficacy and cost-effectiveness.  
20 *Expert review of pharmacoeconomics & outcomes research.* 2012; 12(6): 745-64.  
21  
22  
23 29. Andrews G, Davies M, Titov N. Effectiveness randomized controlled trial of  
24 face to face versus Internet cognitive behaviour therapy for social phobia. *The  
25 Australian and New Zealand journal of psychiatry.* 2011; 45(4): 337-40.  
26  
27  
28 30. Andersson G, Cuijpers P, Carlbring P, Riper H, Hedman E. Guided Internet-  
29 based vs. face-to-face cognitive behavior therapy for psychiatric and somatic disorders:  
30 a systematic review and meta-analysis. *World psychiatry : official journal of the World  
31 Psychiatric Association.* 2014; 13(3): 288-95.  
32  
33  
34 31. Eldenburg L, Krishan R. Management accounting and control in health care:  
35 an economic perspective. In: *Handbook of management accounting research* (eds C  
36 Chapman, A Hopwood, M Shields): 859–83. Elsevier, 2007.  
37  
38  
39 32. Kaplan RS, Porter ME. How to Solve The Cost Crisis In Health Care. *Harvard  
40 Bus Rev.* 2011; 89(9): 46-+.  
41  
42  
43  
44  
45  
46  
47  
48  
49  
50  
51  
52  
53  
54  
55  
56  
57  
58  
59  
60

## HEALTH ECONOMIC EVALUATION OF ICBT FOR SAD

- 1  
2  
3 33. McLaughlin N, Burke MA, Setlur NP, Niedzwiecki DR, Kaplan AL, Saigal C, et  
4  
5 al. Time-driven activity-based costing: a driver for provider engagement in costing  
6  
7 activities and redesign initiatives. *Neurosurg Focus*. 2014; 37(5).  
8  
9  
10 34. Briggs AH, O'Brien BJ. The death of cost-minimization analysis? *Health*  
11  
12 *Econ*. 2001; 10(2): 179-84.  
13  
14 35. Dakin H, Wordsworth S. Cost-Minimisation Analysis Versus Cost-  
15  
16 Effectiveness Analysis, Revisited. *Health Econ*. 2013; 22(1): 22-34.  
17  
18  
19  
20  
21  
22  
23  
24  
25  
26  
27  
28  
29  
30  
31  
32  
33  
34  
35  
36  
37  
38  
39  
40  
41  
42  
43  
44  
45  
46  
47  
48  
49  
50  
51  
52  
53  
54  
55  
56  
57  
58  
59  
60

1  
2  
3  
4  
5  
6  
7  
8  
9  
10  
11  
12  
13  
14  
15  
16  
17  
18  
19  
20  
21  
22  
23  
24  
25  
26  
27  
28  
29  
30  
31  
32  
33  
34  
35  
36  
37  
38  
39  
40  
41  
42  
43  
44  
45  
46  
47  
48  
49  
50  
51  
52  
53  
54  
55  
56  
57  
58  
59  
60



Fig. 1. Mean differences in costs and gained health-related quality of life.

297x210mm (300 x 300 DPI)

Review only



1  
2  
3  
4  
5  
6  
7  
8  
9  
10  
11  
12  
13  
14  
15  
16  
17  
18  
19  
20  
21  
22  
23  
24  
25  
26  
27  
28  
29  
30  
31  
32  
33  
34  
35  
36  
37  
38  
39  
40  
41  
42  
43  
44  
45  
46  
47  
48  
49  
50  
51  
52  
53  
54  
55  
56  
57  
58  
59  
60

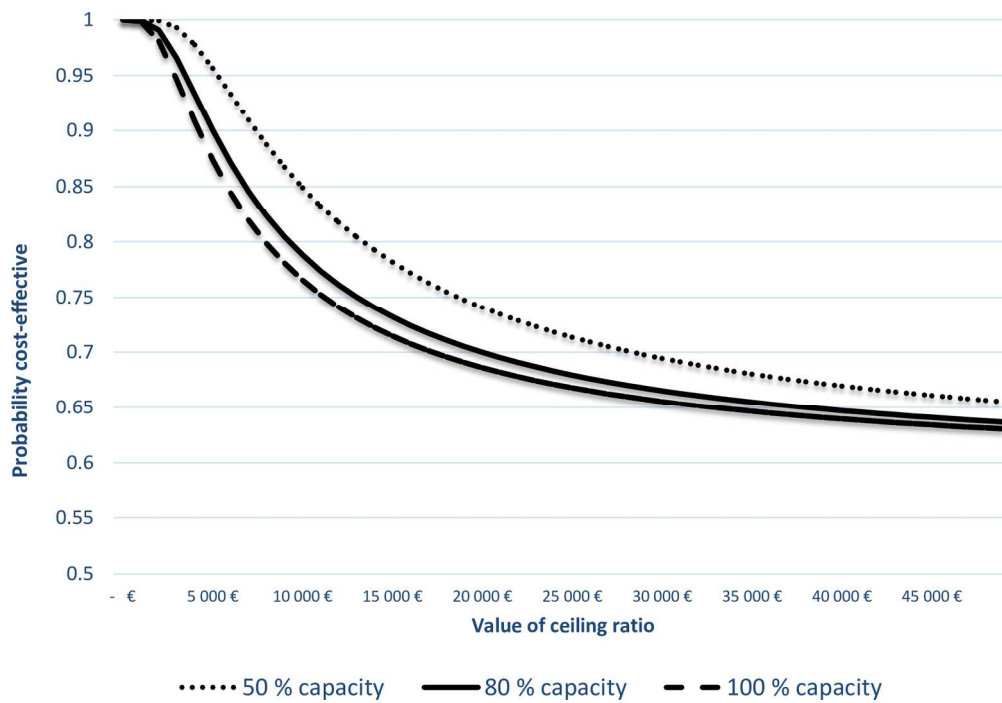

Fig. 2. Cost-effectiveness acceptability curves for different assumptions of practical capacity.

164x113mm (300 x 300 DPI)

View only

1  
2  
3  
4  
5  
6  
7  
8  
9  
10  
11  
12  
13  
14  
15  
16  
17  
18  
19  
20  
21  
22  
23  
24  
25  
26  
27  
28  
29  
30  
31  
32  
33  
34  
35  
36  
37  
38  
39  
40  
41  
42  
43  
44  
45  
46  
47  
48  
49  
50  
51  
52  
53  
54  
55  
56  
57  
58  
59  
60



Fig. 3. Net monetary benefit curves and 95% confidence intervals at 4-year follow-up

297x210mm (300 x 300 DPI)

Review only

## CHEERS checklist—Items to include when reporting economic evaluations of health interventions

| Section/item                                           | Item No | Recommendation                                                                                                                                                                                                                                                                                                               | Reported on page No/<br>line No   |
|--------------------------------------------------------|---------|------------------------------------------------------------------------------------------------------------------------------------------------------------------------------------------------------------------------------------------------------------------------------------------------------------------------------|-----------------------------------|
| <b>Title and abstract</b>                              |         |                                                                                                                                                                                                                                                                                                                              |                                   |
| Title                                                  | 1       | Identify the study as an economic evaluation or use more specific terms such as “cost-effectiveness analysis”, and describe the interventions compared.                                                                                                                                                                      | page 1, line 2                    |
| Abstract                                               | 2       | Provide a structured summary of objectives, perspective, setting, methods (including study design and inputs), results (including base case and uncertainty analyses), and conclusions.                                                                                                                                      | page 2, line 1 to 24              |
| <b>Introduction</b>                                    |         |                                                                                                                                                                                                                                                                                                                              |                                   |
| Background and objectives                              | 3       | Provide an explicit statement of the broader context for the study.                                                                                                                                                                                                                                                          | page 3, line 7 to page 4, line 18 |
|                                                        |         | Present the study question and its relevance for health policy or practice decisions.                                                                                                                                                                                                                                        | page 4, line 9 to 18              |
| <b>Methods</b>                                         |         |                                                                                                                                                                                                                                                                                                                              |                                   |
| Target population and subgroups                        | 4       | Describe characteristics of the base case population and subgroups analysed, including why they were chosen.                                                                                                                                                                                                                 | page 4, line 20 and continued.    |
| Setting and location                                   | 5       | State relevant aspects of the system(s) in which the decision(s) need(s) to be made.                                                                                                                                                                                                                                         | page 4, line 20 and continued.    |
| Study perspective                                      | 6       | Describe the perspective of the study and relate this to the costs being evaluated.                                                                                                                                                                                                                                          | page 6, line 21 and continued.    |
| Comparators                                            | 7       | Describe the interventions or strategies being compared and state why they were chosen.                                                                                                                                                                                                                                      | page 4, line 20 and continued     |
| Time horizon                                           | 8       | State the time horizon(s) over which costs and consequences are being evaluated and say why appropriate.                                                                                                                                                                                                                     | page 5, line 1                    |
| Discount rate                                          | 9       | Report the choice of discount rate(s) used for costs and outcomes and say why appropriate.                                                                                                                                                                                                                                   | page 7, line 11                   |
| Choice of health outcomes                              | 10      | Describe what outcomes were used as the measure(s) of benefit in the evaluation and their relevance for the type of analysis performed.                                                                                                                                                                                      | page 6, line 9                    |
| Measurement of effectiveness                           | 11a     | <i>Single study-based estimates</i> : Describe fully the design features of the single effectiveness study and why the single study was a sufficient source of clinical effectiveness data.                                                                                                                                  | page 7, line 24                   |
|                                                        | 11b     | <i>Synthesis-based estimates</i> : Describe fully the methods used for identification of included studies and synthesis of clinical effectiveness data.                                                                                                                                                                      |                                   |
| Measurement and valuation of preference based outcomes | 12      | If applicable, describe the population and methods used to elicit preferences for outcomes.                                                                                                                                                                                                                                  | not applicable                    |
| Estimating resources and costs                         | 13a     | <i>Single study-based economic evaluation</i> : Describe approaches used to estimate resource use associated with the alternative interventions. Describe primary or secondary research methods for valuing each resource item in terms of its unit cost. Describe any adjustments made to approximate to opportunity costs. |                                   |

| Section/item                                                         | Item No | Recommendation                                                                                                                                                                                                                                                                                                                                        | Reported on page No/<br>line No       |
|----------------------------------------------------------------------|---------|-------------------------------------------------------------------------------------------------------------------------------------------------------------------------------------------------------------------------------------------------------------------------------------------------------------------------------------------------------|---------------------------------------|
|                                                                      | 13b     | <i>Model-based economic evaluation:</i> Describe approaches and data sources used to estimate resource use associated with model health states. Describe primary or secondary research methods for valuing each resource item in terms of its unit cost. Describe any adjustments made to approximate to opportunity costs.                           | not applicable                        |
| Currency, price date, and conversion                                 | 14      | Report the dates of the estimated resource quantities and unit costs. Describe methods for adjusting estimated unit costs to the year of reported costs if necessary. Describe methods for converting costs into a common currency base and the exchange rate.                                                                                        | page 7, line 12                       |
| Choice of model                                                      | 15      | Describe and give reasons for the specific type of decision-analytical model used. Providing a figure to show model structure is strongly recommended.                                                                                                                                                                                                | page 7, line 14                       |
| Assumptions                                                          | 16      | Describe all structural or other assumptions underpinning the decision-analytical model.                                                                                                                                                                                                                                                              |                                       |
| Analytical methods                                                   | 17      | Describe all analytical methods supporting the evaluation. This could include methods for dealing with skewed, missing, or censored data; extrapolation methods; methods for pooling data; approaches to validate or make adjustments (such as half cycle corrections) to a model; and methods for handling population heterogeneity and uncertainty. | page 7, line 19                       |
| <b>Results</b>                                                       |         |                                                                                                                                                                                                                                                                                                                                                       |                                       |
| Study parameters                                                     | 18      | Report the values, ranges, references, and, if used, probability distributions for all parameters. Report reasons or sources for distributions used to represent uncertainty where appropriate. Providing a table to show the input values is strongly recommended.                                                                                   | page 8, lines 11 to 24                |
| Incremental costs and outcomes                                       | 19      | For each intervention, report mean values for the main categories of estimated costs and outcomes of interest, as well as mean differences between the comparator groups. If applicable, report incremental cost-effectiveness ratios.                                                                                                                | figure 1;<br>page 8, lines 11 to 24   |
| Characterising uncertainty                                           | 20a     | <i>Single study-based economic evaluation:</i> Describe the effects of sampling uncertainty for the estimated incremental cost and incremental effectiveness parameters, together with the impact of methodological assumptions (such as discount rate, study perspective).                                                                           | figure 1                              |
|                                                                      | 20b     | <i>Model-based economic evaluation:</i> Describe the effects on the results of uncertainty for all input parameters, and uncertainty related to the structure of the model and assumptions.                                                                                                                                                           | not applicable                        |
| Characterising heterogeneity                                         | 21      | If applicable, report differences in costs, outcomes, or cost-effectiveness that can be explained by variations between subgroups of patients with different baseline characteristics or other observed variability in effects that are not reducible by more information.                                                                            | not applicable                        |
| <b>Discussion</b>                                                    |         |                                                                                                                                                                                                                                                                                                                                                       |                                       |
| Study findings, limitations, generalisability, and current knowledge | 22      | Summarise key study findings and describe how they support the conclusions reached. Discuss limitations and the generalisability of the findings and how the findings fit with current knowledge.                                                                                                                                                     | page 9, line 3 to<br>page 11, line 21 |

| Section/item          | Item No | Recommendation                                                                                                                                                                                                                                    | Reported on page No/<br>line No                |
|-----------------------|---------|---------------------------------------------------------------------------------------------------------------------------------------------------------------------------------------------------------------------------------------------------|------------------------------------------------|
| <b>Other</b>          |         |                                                                                                                                                                                                                                                   |                                                |
| Source of funding     | 23      | Describe how the study was funded and the role of the funder in the identification, design, conduct, and reporting of the analysis. Describe other non-monetary sources of support.                                                               | page 12, line 16                               |
| Conflicts of interest | 24      | Describe any potential for conflict of interest of study contributors in accordance with journal policy. In the absence of a journal policy, we recommend authors comply with International Committee of Medical Journal Editors recommendations. | Information provided via the submission system |

For consistency, the CHEERS statement checklist format is based on the format of the CONSORT statement checklist
